# Supplementary material for: Indirect protection of children from SARS-CoV-2 infection through parental vaccination
Source: PubMed Central journal article supplement (PMC9799368; doi:10.1126/science.abm3087), 2022-01-27
Supplement: science.abm3087_sm.pdf [file science.abm3087_sm.pdf]

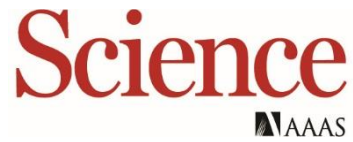

## Supplementary Materials for

### **Indirect protection of children from SARS-CoV-2 infection through parental vaccination**

Samah Hayek *et al.*

Corresponding author: Noam Barda, [noambard@bgu.ac.il](mailto:noambard@bgu.ac.il)

*Science* **375**, 1155 (2022)  
DOI: [10.1126/science.abm3087](https://doi.org/10.1126/science.abm3087)

#### **The PDF file includes:**

Materials and Methods  
Figs. S1 to S3  
Tables S1 to S8  
References

#### **Other Supplementary Material for this manuscript includes the following:**

MDAR Reproducibility Checklist

## **Methods**

### *Data*

We utilized data from Clalit Health Services (CHS), the largest of four integrated payer-provider healthcare organizations in Israel. CHS maintains an electronic health record (EHR) database with over 4.7 million members, accounting for approximately 52% of the Israeli population, which includes extensive demographic and clinical data.

Information in the database allows identification of family relationships (such as parents, spouses, offspring and siblings) and home addresses. The database is linked with data from the Israeli Ministry of Health regarding COVID-19, including PCR-test results, diagnoses, hospitalizations, illness severity determinations and deaths.

### *Study Design*

We conducted a retrospective cohort study aiming to emulate a cluster-randomized mini-community target trial (29), in which households (the clusters of the study) are randomized to have zero, one, or two vaccinated parents. The target trial framework facilitates valid causal inference by guiding the design of observational studies to be analogous to a conceptual randomized clinical trial, which they try to emulate. In this mini-community design, households are considered high-risk settings, where contact between parents and their children results in sufficient transmission to evaluate direct and indirect effects (30,31). Specifically, we assessed the indirect protection of the vaccine by estimating the effect of the number of fully vaccinated parents (zero, one or

two fully vaccinated parents) on the risk of SARS-CoV-2 infection of unvaccinated children in the same household.

The study was performed in two different periods, early and late. The early period was from January 17, 2021, through March 28, 2021, when the dominant strain in Israel was the Alpha (B.1.1.7) variant. During this period, the primary vaccine series of two doses was being administered to individuals aged 16 or older. The late period was from July 11, 2021, through September 30, 2021, when the dominant strain in Israel was the Delta (B.1.617.2) variant. During this period, persons aged 12 or older were eligible for the vaccine and the third (booster) dose was being administered to individuals who had received the second dose at least five months prior.

We included households composed of two spouses listed at the same address, both aged 25-80 years old, along with their children under the minimal age of eligibility for vaccination. All household members needed to have at least one year of continuous membership prior to the study period, except for children younger than 2 years (as CHS membership of new-borns sometimes takes longer to register). We excluded households with no children and households with more than seven members (due to sparse data). Lastly, we excluded households with one or more children eligible to be vaccinated, that is, houses with children aged 16 years or older during the early period or children aged 12 years or older during the late period. Within included households, we excluded person-weeks in which the household included a vaccinated child (some immunosuppressed children under the age of eligibility were still vaccinated), any of the household members died of unrelated causes or any household member was considered

recovered (at least 10 days after a positive test if there were no symptoms for at least 3 days) or partially vaccinated (between the first dose and until 7 days after the second dose). In the late period we also excluded person-weeks of households if either parent was less than 5 months after the second vaccine dose (i.e., ineligible for the booster dose) or less than 7 days after the third vaccine dose.

In both periods, individuals were followed until the earliest of the following events: (1) SARS-CoV-2 infection, (2) death or (3) the end of the study period. The exposure of interest was the number of fully vaccinated parents, represented as a categorical variable: 0, 1 or 2. For the first period, full vaccination was defined as receipt of two vaccine doses with the second dose at least 7 days prior, and fully vaccinated parents were compared to unvaccinated parents. For the second period, full vaccination was defined as receipt of a booster (third) dose at least 7 days prior, and booster-vaccinated parents were compared to parents who had received two doses at least 5 months prior, but had not received the booster. The outcome of interest was RT-PCR confirmed SARS-CoV-2 infection. The timing of the outcome was set based on the sampling date.

Potential confounders were defined by domain expertise, and included demographic and clinical variables measured at the level of the individual (e.g., age, sex and background medical conditions) and at the level of the household (e.g., household size, population sector [General Jewish, Arab, Ultra-orthodox Jewish], socioeconomic status, age of other household members, chronic diseases and medical conditions in other household members). We also adjusted for additional variables such as the calendar week of follow-up, place of residence (district and type as defined by the Israeli Central

Bureau of Statistics), and epidemic activity by location. Supplemental Table 5 provides the complete list of variables, and Supplemental Table 6 provides their definitions. For each variable, we used the last recorded measurement prior to the study period, except for SARS-CoV-2 infection status, vaccination status, pregnancy and epidemic activity by location, which were updated weekly.

### *Statistical Analysis*

A row was created in the study table for each child or adolescent for each week. Each row included the values for the subject's different variables for that week (exposure, outcome and confounders).

The effect measure of interest was vaccine effectiveness (VE), defined as one minus the incidence rate ratio ( $VE=1-IRR$ ) of one or two fully vaccinated parents compared to no fully vaccinated parents (the reference level). To estimate the IRR, we used multi-variable modified Poisson regression (Poisson regression with a binary outcome) (32-34), estimated using generalized estimating equations (GEE) with robust (Sandwich) standard error estimators. Households were used as the clustering variable, and the time unit used was one week. Households were chosen as the level of clustering, since when multiple clusters are nested within one another (e.g., households and children within households), clustering at the top-level accounts for the multilevel structure (35). As suggested by Seaman et al (36), we used an independence working correlation matrix to mitigate informative cluster size bias, which would otherwise be likely given the study design. The models were adjusted for all the confounders mentioned above

(Supplemental Table 5). Subgroup analyses were performed for different household sizes (3-7) and for different age groups.

A complete-case analysis was conducted to deal with missing data, as missing data are rare in the CHS database for the confounders used in this study. To judge model fit, we plotted the rate of observed events against the rate predicted by the model in deciles across household sizes.

### *Additional Analyses*

We sought to further explore the mechanism of the indirect effect by analyzing two parts of the transmission chain separately: First, we estimated the direct effect of the BNT162b2 mRNA COVID-19 vaccine on the vaccinated parents, and second, we estimated the risk of transmission (Household Infectiousness or secondary attack rate, SAR) from an infected parent to a susceptible child.

For the direct effect, we performed the same analysis described above, with the unit of observation set to be each parent, and the outcome set to be an RT-PCR-confirmed SARS-CoV-2 infection among each parent. We further adjusted for pregnancy and smoking status in the index parent and the vaccination status of the other parent. For the SAR, we changed the unit of observation to be an entire household, with the study population consisting of households in which a parent was diagnosed with infection (the “index parent”). The exposure was the vaccination status of the index parent, and the outcome was infection of at least one child in the household in days 3-8 following

diagnosis of the index parent (to account for the incubation period). To keep the point-of-entry of the infection into the household well-defined, we excluded households in which any member other than the index parent was diagnosed with SARS-CoV-2 within 2 days of the index parent. Modeling was performed using multivariable logistic regression, adjusted for the household level characteristics from the previous models, the calendar week, pregnancy status of both parents and the vaccination status of the other parent. The effect measure was one minus the odds ratio (1-OR).

Lastly, to investigate the possibility of unmeasured confounding, we used bacterial diarrhea as a negative control outcome (20,21). By not being affected by SARS-CoV-2 vaccination but plausibly sharing confounders with the outcome of interest, we can use the negative control outcome to detect confounding bias. This analysis was performed in the early period.

All analyses were performed using the R statistical programming language, version 4.0.2. Technical details of the models are presented in Supplemental Table 7. Model output summaries are presented in Supplemental Table 8.

### *Ethics*

The study was approved by the CHS institutional review board, approval number 0052-20-COM2.

**Supplemental Figure 1a: Flow chart for Study Participants during the Early Period, January 17, 2021 - March 28, 2021**

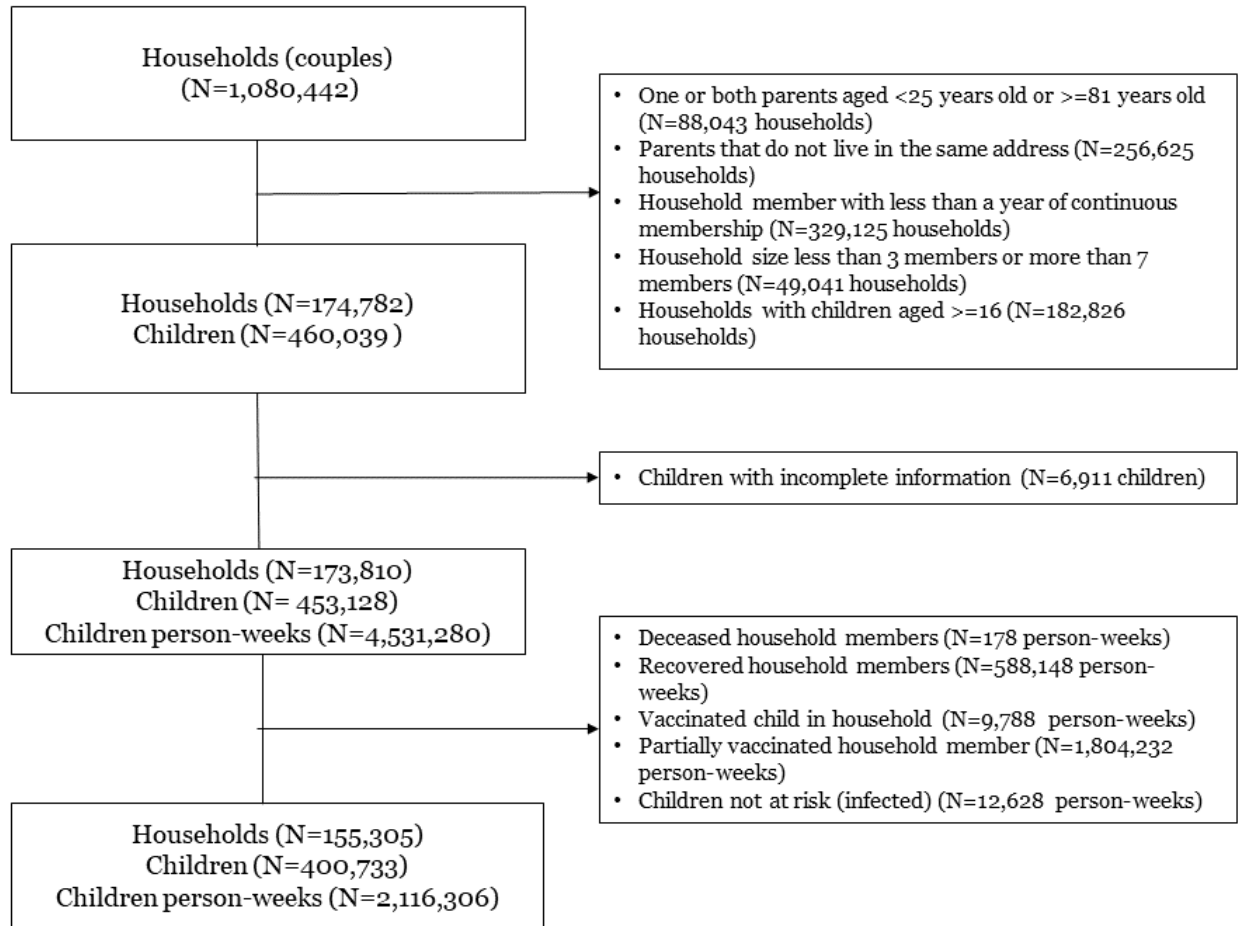



**Supplemental Figure 1b: Flow chart for Study Participants During the Late Period, July 11, 2021 - September 30, 2021**

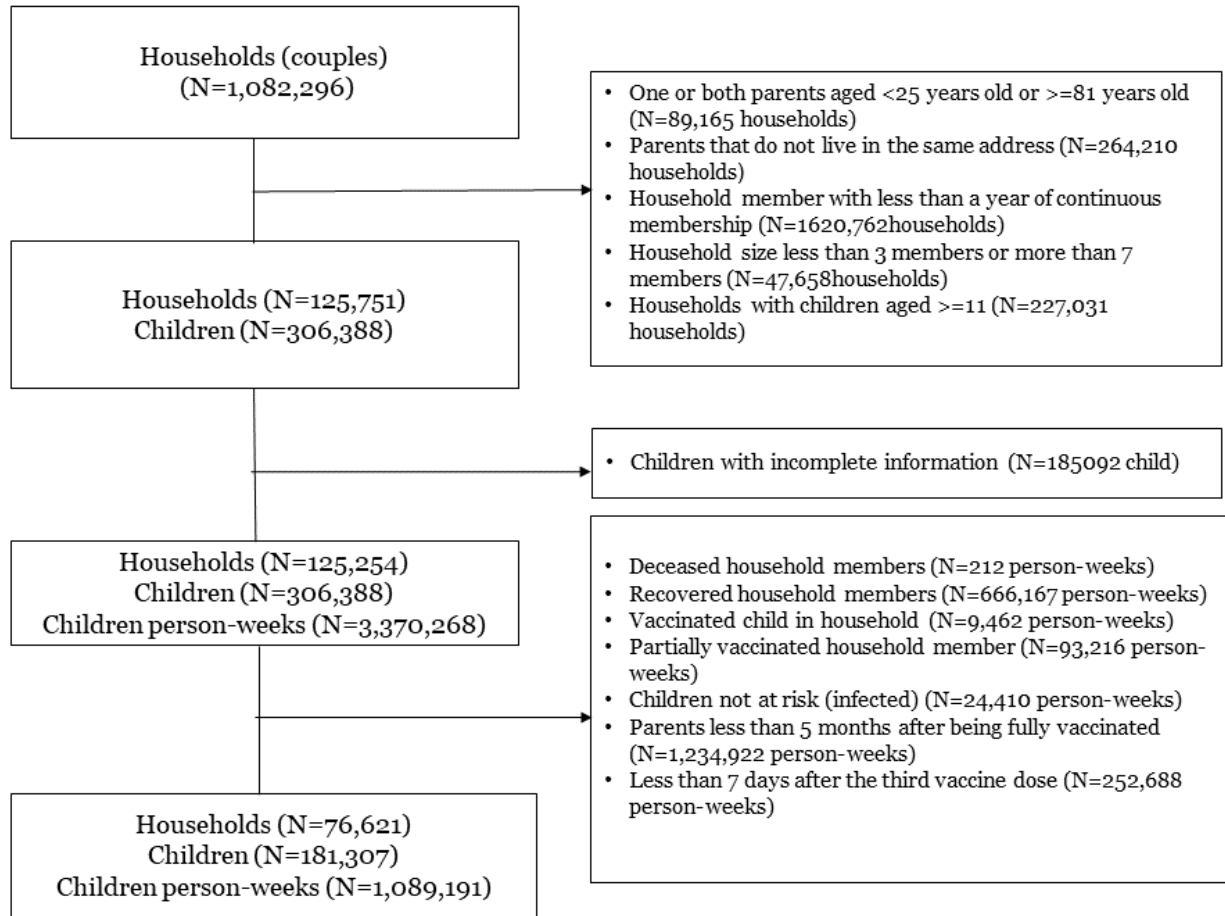

Caption: Study population flow-chart showing the effect of the different inclusion and exclusion criteria on the study population. The arrangement shows selection of households, then children and finally children person-weeks. Panel A shows the early period (January 17, 2021, to March 28, 2021) and panel B shows the late period (July 11, 2021, to September 30, 2021).

**Supplemental Figure 2a: Incidence of Infections during the Early Period, by Age Group**

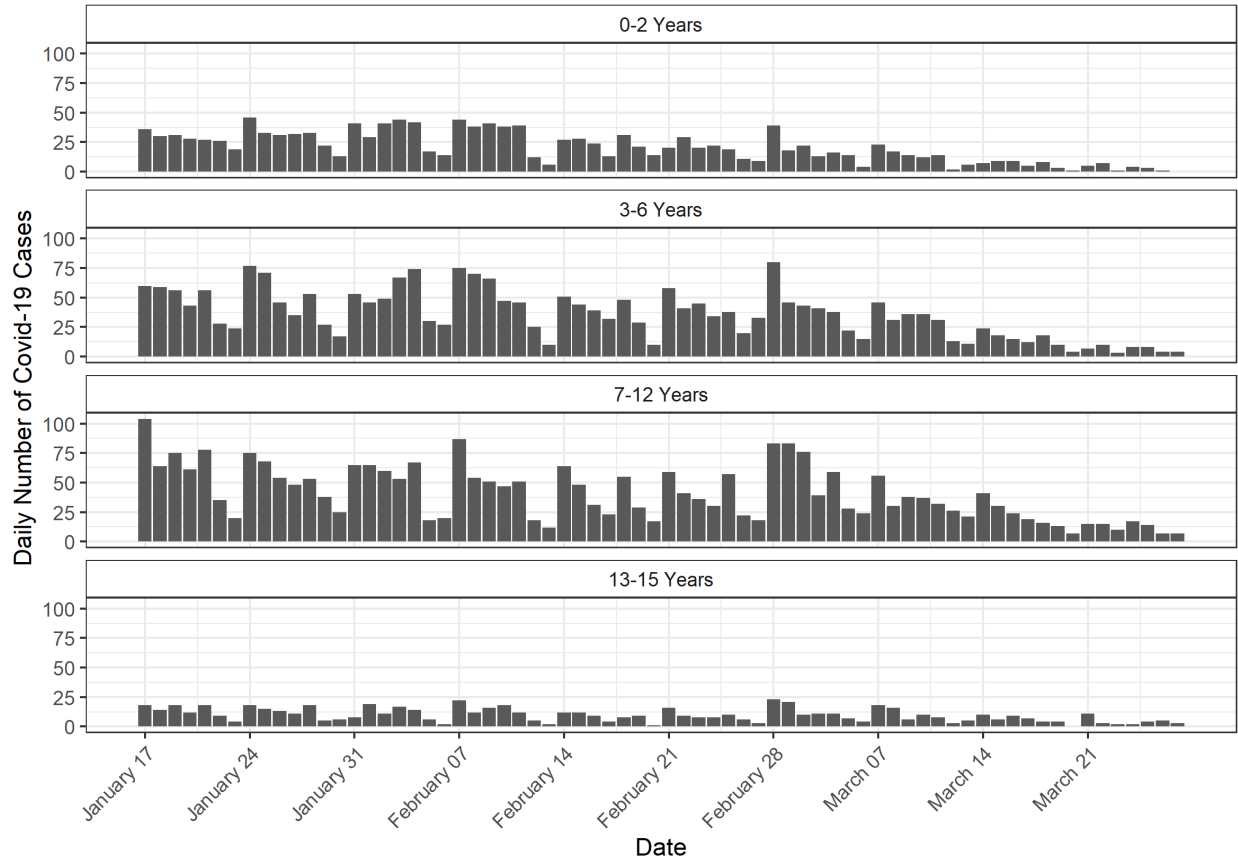

**Supplemental Figure 2b: Incidence of Infections during the Late Period, by Age Group**

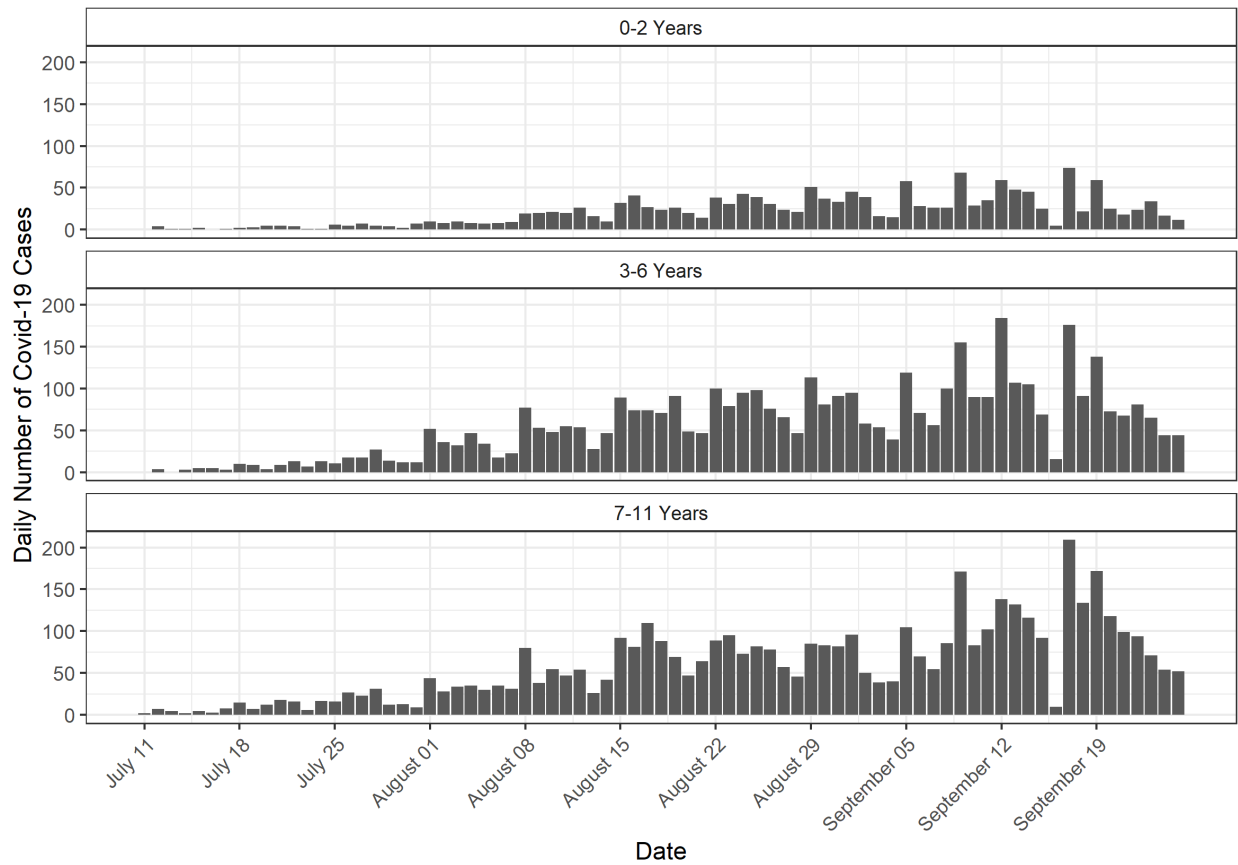

Caption: An “epidemic curve” showing the incidence of cases (RT-PCR confirmed SARS-CoV-2 infections) in the study population (susceptible children under the age of vaccine eligibility) by date. Panel A shows the first study period (vaccination with two doses at least 7 days prior vs. no vaccination, Alpha variant) and panel B shows the second study period (receipt of the booster dose vs. no receipt of the booster dose, Delta variant). The early period was January 17, 2021, to March 28, 2021. The late period was July 11, 2021, to September 30, 2021.

# Supplemental Figure 3a: Model Goodness-of-fit for the Early Period

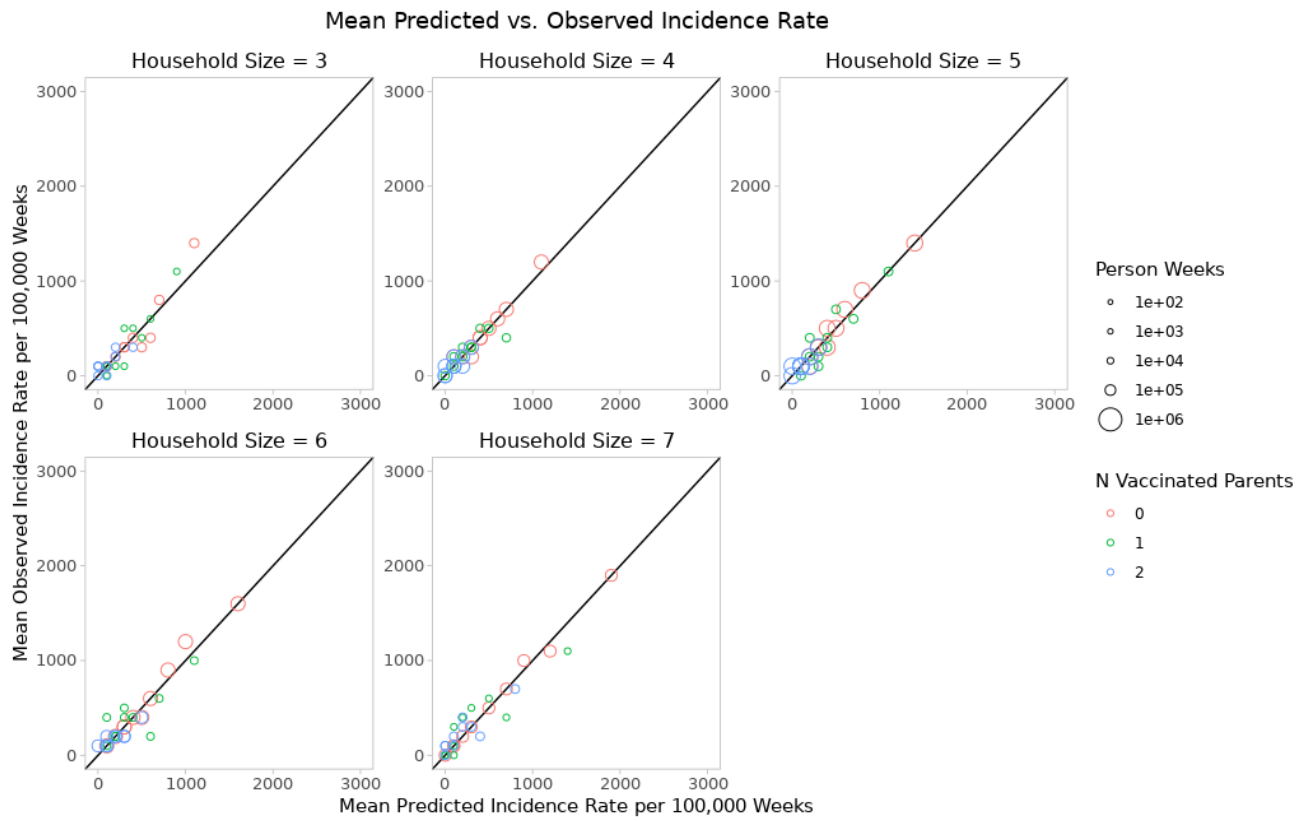

### Supplemental Figure 3b: Model Goodness-of-fit for the Late Period

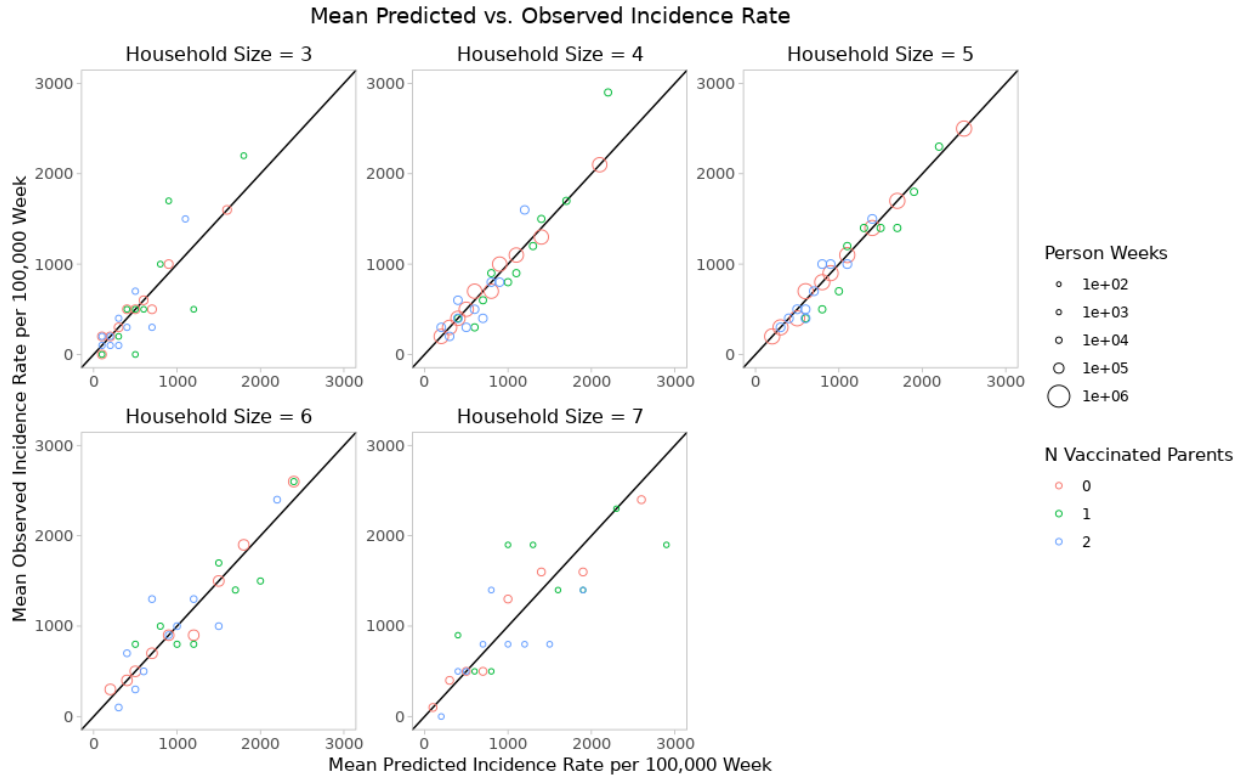

Caption: An observed vs. predicted plot, used to assess the model goodness-of-fit. The Y axis is the mean observed incidence per 100,000 weeks in each decile of predictions. The X axis is the mean predicted incidence per 100,000 weeks in each decile of predictions. The color indicates the exposure (0, 1 or 2 vaccinated parents). The size of each point indicates the number of person-weeks it includes. Values on the diagonal line indicate perfect prediction.

**Supplemental Table 1: Descriptive Statistics of the Study Population by Person-weeks, Stratified by Parental Vaccination Status**

| Characteristic          | Early Period                                     |                                                 |                                                  | Late Period                                    |                                                |                                                  |
|-------------------------|--------------------------------------------------|-------------------------------------------------|--------------------------------------------------|------------------------------------------------|------------------------------------------------|--------------------------------------------------|
|                         | Unvaccinated parents<br>(1,098,088 Person-weeks) | One vaccinated parent<br>(124,228 Person-weeks) | Two vaccinated parents<br>(893,990 Person-weeks) | Unvaccinated parents<br>(897,361 Person-weeks) | One vaccinated parent<br>(58,420 Person-weeks) | Two vaccinated parents<br>(133,410 Person-weeks) |
| Age (N, %)              |                                                  |                                                 |                                                  |                                                |                                                |                                                  |
| 0-2                     | 249,922 (23%)                                    | 24,895 (20%)                                    | 148,827(17%)                                     | 228,366(25%)                                   | 14,913 (26%)                                   | 31,579(24%)                                      |
| 3-6                     | 392,965 (36%)                                    | 42,420 (34%)                                    | 277,185(31%)                                     | 374,680(42%)                                   | 24,101 (41%)                                   | 5,373 (40%)                                      |
| 7-12*                   | 380,634 (35%)                                    | 45,945 (37%)                                    | 372,452(42%)                                     | 294,315(33%)                                   | 19,406 (33%)                                   | 4,809 (36%)                                      |
| 13-15                   | 74,563 (6.8%)                                    | 10,967 (8.8%)                                   | 95,526(11%)                                      | --                                             | --                                             | --                                               |
| Sex (N, %)              |                                                  |                                                 |                                                  |                                                |                                                |                                                  |
| Female                  | 568,552 (52%)                                    | 64,082 (52%)                                    | 459,043(51%)                                     | 462,068(51%)                                   | 29,995(51%)                                    | 68221 (51%)                                      |
| Male                    | 529,536 (48%)                                    | 60,146 (48%)                                    | 434,947(49%)                                     | 435,293(49%)                                   | 28,425(49%)                                    | 65189 (49%)                                      |
| Population group (N, %) |                                                  |                                                 |                                                  |                                                |                                                |                                                  |
| Arabs                   | 422,747 (38%)                                    | 42,353(34%)                                     | 108,410(12%)                                     | 158,967(18%)                                   | 11,032(19%)                                    | 6366 (4.8%)                                      |

|                              |               |              |               |               |              |              |
|------------------------------|---------------|--------------|---------------|---------------|--------------|--------------|
| General                      | 590,990 (54%) | 77,010(62%)  | 756,054(85%)  | 696,696(78%)  | 44,674(76%)  | 121944 (91%) |
| Ultra-Orthodox Jewish        | 84,351 (7.7%) | 4,865(3.9%)  | 29,526(3.3%)  | 41,698(4.6%)  | 2,714 (4.6%) | 5100 (3.8%)  |
| Socioeconomic Status (N, %)  |               |              |               |               |              |              |
| Low                          | 791,714 (72%) | 78,606(63%)  | 332,054(37%)  | 428, 722(48%) | 29,073 (50%) | 39,894(30%)  |
| Medium                       | 280,502 (26%) | 41,595(33%)  | 514,383 (58%) | 438705(49%)   | 27,423 (47%) | 87,573(66%)  |
| High                         | 25,872 (2.4%) | 4,027(3.2%)  | 47,553(5.3%)  | 29,934(3.3%)  | 1,924 (3.3%) | 5,943(4.5%)  |
| Household size (median, IQR) | 5 (4, 6)      | 5(4, 6)      | 5 (4, 5)      | 5 (4, 5)      | 5 (4, 5)     | 5 (4, 5)     |
| Household size (N, %)        |               |              |               |               |              |              |
| 3                            | 59,444 (5.4%) | 8,492(6.8%)  | 35,339(4.0%)  | 55,172(6.1%)  | 114 (7.0%)   | 8,938 (6.7%) |
| 4                            | 260,839 (24%) | 36,544 (29%) | 252,640(28%)  | 317,150(35%)  | 21,631 (37%) | 49,105(37%)  |
| 5                            | 371,515 (34%) | 44,732 (36%) | 409,016(46%)  | 370,824(41%)  | 22,781 (39%) | 56,499 (42%) |
| 6                            | 260,465 (24%) | 24,533 (20%) | 151,710(17%)  | 119,083(13%)  | 7,754(13%)   | 15,168(11%)  |
| 7                            | 145,825 (13%) | 9,927 (8.0%) | 45,285(5.1%)  | 35,132(3.9%)  | 2,140 (3.7%) | 3,700(2.8%)  |
| Residence type (N, %)        |               |              |               |               |              |              |
| Large City                   | 363,629 (33%) | 36,524(29%)  | 272,601(30%)  | 302,806(34%)  | 19,267(33%)  | 50,894(38%)  |
| Small City                   | 415,039 (38%) | 48,469 (39%) | 324,402 (36%) | 335,198 (37%) | 22,345(38%)  | 46,348(35%)  |
| Town                         | 230,254 (21%) | 25,935 (21%) | 149983 (17%)  | 145,470 (16%) | 9,913(17%)   | 16,425(12%)  |
| Rural                        | 69,592 (6.3%) | 8,969 (7.2%) | 87,581 (9.8%) | 71,486 (8.0%) | 4,563(7.8%)  | 11,299(8.5%) |

|                                       |               |              |               |               |              |              |
|---------------------------------------|---------------|--------------|---------------|---------------|--------------|--------------|
| Kibbutz (Communal Residence)          | 19,574 (1.8%) | 4,331 (3.5%) | 59,423 (6.6%) | 42,401 (4.7%) | 2,332(4.0%)  | 8,444(6.3%)  |
| Obesity (N, %)                        | 62,357 (5.7%) | 8,160 (6.6%) | 58,659 (6.6%) | 47,859 (5.3%) | 3,151(5.4%)  | 7,136(5.3%)  |
| Cardiovascular conditions (N, %)      | 3,440 (0.3%)  | 352 (0.3%)   | 2,554 (0.3%)  | 2,266 (0.3%)  | 159(0.3%)    | 349 (0.3%)   |
| Pulmonary disease (N, %)              | 115,525 (11%) | 14,857 (12%) | 117,820 (13%) | 95,662 (11%)  | 6,256(11%)   | 13,446(10%)  |
| Type 2 diabetes (N, %)                | 5,745 (0.5%)  | 614 (0.5%)   | 3,767 (0.4%)  | 3,254 (0.4%)  | 196(0.3%)    | 465(0.3%)    |
| Hypertension (N, %)                   | 1,538 (0.1%)  | 208 (0.2%)   | 1,536 (0.2%)  | 1,168 (0.1%)  | 79(0.1%)     | 206(0.2%)    |
| Active malignancy (N, %)              | 583 (<0.1%)   | 84 (<0.1%)   | 572 (<0.1%)   | 672 (<0.1%)   | 5 (<0.1%)    | 111(<0.1%)   |
| Male household members (N, %)         |               |              |               |               |              |              |
| 0                                     | 87 (<0.1%)    | 10 (<0.1%)   | 117 (<0.1%)   | 165 (<0.1%)   | 8 (<0.1%)    | 38 (<0.1%)   |
| 1                                     | 308,336 (28%) | 40,228 (32%) | 274,956 (31%) | 311,482 (35%) | 20,979 (36%) | 48,473 (36%) |
| 2                                     | 454,229 (41%) | 52,144 (42%) | 400,453 (45%) | 401,493 (45%) | 26,086 (45%) | 59,299 (44%) |
| 3                                     | 253,469 (23%) | 25,214 (20%) | 183,019 (20%) | 157,014 (17%) | 9,329 (16%)  | 22,270 (17%) |
| 4                                     | 72,392 (6.6%) | 5,929 (4.8%) | 32,391 (3.6%) | 25,019 (2.8%) | 1,854 (3.2%) | 3,060 (2.3%) |
| 5                                     | 9,575 (0.9%)  | 703 (0.6%)   | 3,054 (0.3%)  | 2,188 (0.2%)  | 164 (0.3%)   | 270 (0.2%)   |
| Adult smokers in the household (N, %) |               |              |               |               |              |              |
| 0                                     | 465,482 (42%) | 55,370 (45%) | 440,851 (49%) | 408,833 (46%) | 25,930 (44%) | 67,471 (51%) |
| 1                                     | 486,885 (44%) | 52,263 (42%) | 315,850 (35%) | 342,542 (38%) | 22,974 (39%) | 45,179 (34%) |



|   |               |              |               |               |             |              |
|---|---------------|--------------|---------------|---------------|-------------|--------------|
| 2 | 145,721 (13%) | 16,595 (13%) | 137,289 (15%) | 145,986 (16%) | 9,516 (16%) | 20,760 (16%) |
|---|---------------|--------------|---------------|---------------|-------------|--------------|

Obese household members (N, %)

|   |               |              |               |               |              |              |
|---|---------------|--------------|---------------|---------------|--------------|--------------|
| 0 | 712,037 (65%) | 80,922 (65%) | 596,379 (67%) | 618,787 (69%) | 39,427 (67%) | 92,431 (69%) |
| 1 | 284,721 (26%) | 31,164 (25%) | 216,702 (24%) | 213,258 (24%) | 14,477 (25%) | 31,041 (23%) |
| 2 | 80,103 (7.3%) | 9,640 (7.8%) | 63,092 (7.1%) | 54,532 (6.1%) | 3,762 (6.4%) | 8,313 (6.2%) |
| 3 | 17,741 (1.6%) | 2,005 (1.6%) | 14,819 (1.7%) | 9,663 (1.1%)  | 656 (1.1%)   | 1453 (1.1%)  |
| 4 | 3,123 (0.3%)  | 387 (0.3%)   | 2,691 (0.3%)  | 1,078 (0.1%)  | 94 (0.2%)    | 159 (0.1%)   |
| 5 | 344 (<0.1%)   | 109 (<0.1%)  | 262 (<0.1%)   | 43 (<0.1%)    | 4 (<0.1%)    | 13 (<0.1%)   |
| 6 | 19 (<0.1%)    | 1 (<0.1%)    | 45 (<0.1%)    |               |              |              |

|                        |                |              |               |               |              |              |
|------------------------|----------------|--------------|---------------|---------------|--------------|--------------|
| Pregnancy in HH (N, %) | 104,689 (9.5%) | 20,824 (17%) | 25,295 (2.8%) | 58,284 (6.5%) | 5,340 (9.1%) | 6,741 (5.1%) |
|------------------------|----------------|--------------|---------------|---------------|--------------|--------------|

Household members with cardiovascular disease (N, %)

|   |                 |               |               |               |              |               |
|---|-----------------|---------------|---------------|---------------|--------------|---------------|
| 0 | 1,044,115 (95%) | 117,155 (94%) | 842,342 (94%) | 858,988 (96%) | 55,244 (95%) | 12,7161 (95%) |
| 1 | 52,535 (4.8%)   | 6,898 (5.6%)  | 50,590 (5.7%) | 37,624 (4.2%) | 3,122 (5.3%) | 6,106 (4.6%)  |
| 2 | 1,432 (0.1%)    | 175 (0.1%)    | 1,054 (0.1%)  | 735 (<0.1%)   | 54 (<0.1%)   | 143 (0.1%)    |
| 3 | 6 (<0.1%)       | 0 (0%)        | 4 (<0.1%)     | 14 (<0.1%)    | 0 (0%)       | 0 (0%)        |

Household members with respiratory disease (N, %)

|   |               |              |               |               |              |              |
|---|---------------|--------------|---------------|---------------|--------------|--------------|
| 0 | 773,858 (70%) | 85,710 (69%) | 599,770 (67%) | 636,639 (71%) | 41,383 (71%) | 94,736 (71%) |
| 1 | 245,625 (22%) | 29,319 (24%) | 218,713 (24%) | 205,014 (23%) | 13,566 (23%) | 30,762 (23%) |
| 2 | 61,320 (5.6%) | 7,546 (6.1%) | 59,858 (6.7%) | 46,059 (5.1%) | 2,842 (4.9%) | 6,627 (5.0%) |
| 3 | 13,812 (1.3%) | 1,421 (1.1%) | 13,484 (1.5%) | 8,638 (1.0%)  | 561 (1.0%)   | 1179 (0.9%)  |
| 4 | 3,073 (0.3%)  | 214 (0.2%)   | 1,953 (0.2%)  | 948 (0.1%)    | 65 (0.1%)    | 102 (<0.1%)  |
| 5 | 392 (<0.1%)   | 18 (<0.1%)   | 169 (<0.1%)   | 28 (<0.1%)    | 3 (<0.1%)    | 4 (<0.1%)    |
| 6 | 8 (<0.1%)     | 0 (0%)       | 43 (<0.1%)    | 35 (<0.1%)    | 0 (0%)       | 0 (0%)       |

Household members  
with type 2 diabetes (N,  
%)

|   |                 |               |               |               |              |               |
|---|-----------------|---------------|---------------|---------------|--------------|---------------|
| 0 | 1,035,692 (94%) | 115,527 (93%) | 842,606 (94%) | 858,188 (96%) | 55,251 (95%) | 126,782 (95%) |
| 1 | 59,946 (5.5%)   | 8,330 (6.7%)  | 49,153 (5.5%) | 37,787 (4.2%) | 3,046 (5.2%) | 6,361 (4.8%)  |
| 2 | 2,388 (0.2%)    | 365 (0.3%)    | 2,160 (0.2%)  | 1377 (0.2%)   | 123 (0.2%)   | 267 (0.2%)    |
| 3 | 62 (<0.1%)      | 6 (<0.1%)     | 71 (<0.1%)    | 9 (<0.1%)     | 0 (0%)       | 0 (0%)        |

Household members  
with hypertension (N, %)

|   |                 |               |               |               |              |               |
|---|-----------------|---------------|---------------|---------------|--------------|---------------|
| 0 | 1,011,285 (92%) | 110,966 (89%) | 789,186 (88%) | 822,057 (92%) | 52,553 (90%) | 119,221 (89%) |
| 1 | 82,902 (7.5%)   | 12,663 (10%)  | 98,585 (11%)  | 72,120 (8.0%) | 5,574 (9.5%) | 13,382 (10%)  |
| 2 | 3,754 (0.3%)    | 594 (0.5%)    | 6,144 (0.7%)  | 3,102 (0.3%)  | 290 (0.5%)   | 804 (0.6%)    |
| 3 | 139 (<0.1%)     | 5 (<0.1%)     | 75 (<0.1%)    | 70 (<0.1%)    | 3 (<0.1%)    | 3 (<0.1%)     |
| 4 | 8 (<0.1%)       | 0 (0%)        | 0 (0%)        | 12 (<0.1%)    | 0 (0%)       | 0 (0%)        |

Household members  
with active malignancy  
(N, %)

|   |                 |               |               |               |              |               |
|---|-----------------|---------------|---------------|---------------|--------------|---------------|
| 0 | 1,091,083 (99%) | 122,746 (99%) | 883,268 (99%) | 889,718 (99%) | 57,847 (99%) | 132,064 (99%) |
| 1 | 6,981 (0.6%)    | 1,458 (1.2%)  | 10,660 (1.2%) | 7,598 (0.8%)  | 567 (1.0%)   | 1330 (1.0%)   |
| 2 | 24 (<0.1%)      | 24 (<0.1%)    | 62 (<0.1%)    | 43 (<0.1%)    | 6 (<0.1%)    | 16 (<0.1%)    |
| 3 |                 |               |               | 2 (<0.1%)     | 0 (0%)       | 0 (0%)        |

Household members age  
0-2 (N, %)

|   |               |              |               |               |              |              |
|---|---------------|--------------|---------------|---------------|--------------|--------------|
| 0 | 666,050 (61%) | 86,234 (69%) | 661,257 (74%) | 568,652 (63%) | 37,505 (64%) | 89,228 (67%) |
| 1 | 377,867 (34%) | 34,768 (28%) | 217,442 (24%) | 302,802 (34%) | 19,137 (33%) | 41,191 (31%) |
| 2 | 52,321 (4.8%) | 3,134 (2.5%) | 15,008 (1.7%) | 25,393 (2.8%) | 1,690 (2.9%) | 2,962 (2.2%) |
| 3 | 1,800 (0.2%)  | 87 (<0.1%)   | 279 (<0.1%)   | 498 (<0.1%)   | 78 (0.1%)    | 29 (<0.1%)   |
| 4 | 50 (<0.1%)    | 5 (<0.1%)    | 4 (<0.1%)     | 16 (<0.1%)    | 10 (<0.1%)   | 0 (0%)       |

Household members age  
3-6 (N, %)

|   |               |               |               |               |              |               |
|---|---------------|---------------|---------------|---------------|--------------|---------------|
| 0 | 457,265 (42%) | 59,681 (48%)  | 449,998 (50%) | 362,762 (40%) | 24,738 (42%) | 57,382 (43%)  |
| 1 | 492,602 (45%) | 53,763 (43%)  | 382,531 (43%) | 440,968 (49%) | 27,893 (48%) | 64,116 (48%)  |
| 2 | 136,165 (12%) | 10,136 (8.2%) | 58,959 (6.6%) | 88,829 (9.9%) | 5,451 (9.3%) | 11,369 (8.5%) |
| 3 | 11,802 (1.1%) | 631 (0.5%)    | 2,466 (0.3%)  | 4,711 (0.5%)  | 334 (0.6%)   | 538 (0.4%)    |
| 4 | 254 (<0.1%)   | 17 (<0.1%)    | 36 (<0.1%)    | 91 (<0.1%)    | 4 (<0.1%)    | 5 (<0.1%)     |

Household members age  
7-12 (N, %)

|   |               |              |               |               |              |              |
|---|---------------|--------------|---------------|---------------|--------------|--------------|
| 0 | 477,917 (44%) | 53,770 (43%) | 332,117 (37%) | 456,699 (51%) | 30,137 (52%) | 64,842 (49%) |
| 1 | 380,011 (35%) | 46,107 (37%) | 385,220 (43%) | 322,083 (36%) | 20,729 (35%) | 51,536 (39%) |
| 2 | 203,765 (19%) | 21,487 (17%) | 160,507 (18%) | 109,635 (12%) | 6,989 (12%)  | 15,915 (12%) |
| 3 | 35,039 (3.2%) | 2,785 (2.2%) | 15,708 (1.8%) | 8,775 (1.0%)  | 556 (1.0%)   | 1,109 (0.8%) |
| 4 | 1,356 (0.1%)  | 79 (<0.1%)   | 438 (<0.1%)   | 169 (<0.1%)   | 9 (<0.1%)    | 8 (<0.1%)    |

Household members age  
13-15 (N, %)

|   |               |               |               |    |    |    |
|---|---------------|---------------|---------------|----|----|----|
| 0 | 945,205 (86%) | 103,484 (83%) | 719,934 (81%) | -- | -- | -- |
| 1 | 125,465 (11%) | 17,314 (14%)  | 152,962 (17%) | -- | -- | -- |
| 2 | 26,642 (2.4%) | 3,361 (2.7%)  | 20,733 (2.3%) | -- | -- | -- |
| 3 | 775 (<0.1%)   | 69 (<0.1%)    | 361 (<0.1%)   | -- | -- | -- |
| 4 | 1 (<0.1%)     | 0 (0%)        | 0 (0%)        | -- | -- | -- |

Household members age  
19-40 (N, %)

|   |               |              |               |               |              |              |
|---|---------------|--------------|---------------|---------------|--------------|--------------|
| 0 | 93,581 (8.5%) | 18,509 (15%) | 250,297 (28%) | 85,758 (9.6%) | 6,007 (10%)  | 23,884 (18%) |
| 1 | 204,502 (19%) | 29,134 (23%) | 211,939 (24%) | 162,740 (18%) | 13,946 (24%) | 30,535 (23%) |
| 2 | 800,005 (73%) | 76,585 (62%) | 431,754 (48%) | 648,863 (72%) | 38,467 (66%) | 78,991 (59%) |

Household members age  
41-60 (N, %)

|                                       |                  |                |                |                |               |                |
|---------------------------------------|------------------|----------------|----------------|----------------|---------------|----------------|
| 0                                     | 800,160 (73%)    | 76,703 (62%)   | 432,317 (48%)  | 649,064 (72%)  | 38,505 (66%)  | 79,078 (59%)   |
| 1                                     | 205,192 (19%)    | 29,251 (24%)   | 213,425 (24%)  | 163,026 (18%)  | 14,027 (24%)  | 30,724 (23%)   |
| 2                                     | 92,736 (8.4%)    | 18,274 (15%)   | 248,248 (28%)  | 85,271 (9.5%)  | 5,888 (10%)   | 23,608 (18%)   |
| Household members 61-80 (N, %)        |                  |                |                |                |               |                |
| 0                                     | 1,097,126 (100%) | 123,904 (100%) | 891,689 (100%) | 896,706 (100%) | 58,263 (100%) | 133,087 (100%) |
| 1                                     | 924 (<0.1%)      | 295 (0.2%)     | 1,990 (0.2%)   | 622 (<0.1%)    | 157 (0.3%)    | 283 (0.2%)     |
| 2                                     | 38 (<0.1%)       | 29 (<0.1%)     | 311 (<0.1%)    | 33 (<0.1%)     | 0 (0%)        | 40 (<0.1%)     |
| Calendar week for early period (N, %) |                  |                |                |                |               |                |
| 2021-01-17                            | 237,454 (22%)    | 0 (0%)         | 0 (0%)         | --             | --            | --             |
| 2021-01-24                            | 197,603 (18%)    | 2,631 (2.1%)   | 1,790 (0.2%)   | --             | --            | --             |
| 2021-01-31                            | 166,398 (15%)    | 10,042 (8.1%)  | 14,869 (1.7%)  | --             | --            | --             |
| 2021-02-07                            | 135,380 (12%)    | 15,403 (12%)   | 45,061 (5.0%)  | --             | --            | --             |
| 2021-02-14                            | 98,373 (9.0%)    | 14,226 (11%)   | 61,871 (6.9%)  | --             | --            | --             |
| 2021-02-21                            | 69,538 (6.3%)    | 13,161 (11%)   | 92,818 (10%)   | --             | --            | --             |
| 2021-02-28                            | 56,939 (5.2%)    | 13,853 (11%)   | 126,738 (14%)  | --             | --            | --             |
| 2021-03-07                            | 49,686 (4.5%)    | 14,799 (12%)   | 154,850 (17%)  | --             | --            | --             |
| 2021-03-14                            | 44,670 (4.1%)    | 17,311 (14%)   | 182,094 (20%)  | --             | --            | --             |
| 2021-03-21                            | 42,047 (3.8%)    | 22,802 (18%)   | 213,899 (24%)  | --             | --            | --             |

Calendar week for late period (N, %)

|                                                        |                            |                            |                            |                         |                         |                         |
|--------------------------------------------------------|----------------------------|----------------------------|----------------------------|-------------------------|-------------------------|-------------------------|
| 2021-07-11                                             | --                         | --                         | --                         | 39,594 (4.4%)           | 0 (0%)                  | 0 (0%)                  |
| 2021-07-18                                             | --                         | --                         | --                         | 63,203 (7.0%)           | 0 (0%)                  | 0 (0%)                  |
| 2021-07-25                                             | --                         | --                         | --                         | 84,582 (9.4%)           | 20 (<0.1%)              | 0 (0%)                  |
| 2021-08-01                                             | --                         | --                         | --                         | 94,289 (11%)            | 50 (<0.1%)              | 0 (0%)                  |
| 2021-08-08                                             | --                         | --                         | --                         | 112,863 (13%)           | 76 (0.1%)               | 2 (<0.1%)               |
| 2021-08-15                                             | --                         | --                         | --                         | 124,176 (14%)           | 142 (0.2%)              | 4 (<0.1%)               |
| 2021-08-22                                             | --                         | --                         | --                         | 105,786 (12%)           | 295 (0.5%)              | 29 (<0.1%)              |
| 2021-08-29                                             | --                         | --                         | --                         | 79,401 (8.8%)           | 2,870 (4.9%)            | 3,333 (2.5%)            |
| 2021-09-05                                             | --                         | --                         | --                         | 72,228 (8.0%)           | 12,526 (21%)            | 24,005 (18%)            |
| 2021-09-12                                             | --                         | --                         | --                         | 64,127 (7.1%)           | 20,785 (36%)            | 48,106 (36%)            |
| 2021-09-19                                             | --                         | --                         | --                         | 57,112 (6.4%)           | 21,656 (37%)            | 57,931 (43%)            |
| Epidemic activity by location, ages 0-2 (median, IQR)  | 0.0056<br>(0.0041, 0.0072) | 0.0055<br>(0.0042, 0.0070) | 0.0052<br>(0.0037, 0.0066) | 0.004<br>(0.002, 0.009) | 0.011<br>(0.009, 0.013) | 0.012<br>(0.010, 0.013) |
| Epidemic activity by location, ages 3-6 (median, IQR)  | 0.0067<br>(0.0051, 0.0087) | 0.0063<br>(0.0050, 0.0076) | 0.0062<br>(0.0047, 0.0074) | 0.008<br>(0.004, 0.013) | 0.018<br>(0.015, 0.021) | 0.019<br>(0.016, 0.021) |
| Epidemic activity by location, ages 7-12 (median, IQR) | 0.009<br>(0.007, 0.011)    | 0.008<br>(0.006, 0.009)    | 0.008<br>(0.006, 0.009)    | 0.010<br>(0.005, 0.016) | 0.021<br>(0.017, 0.024) | 0.021<br>(0.018, 0.024) |

|                                                         |                         |                         |                         |                            |                            |                            |
|---------------------------------------------------------|-------------------------|-------------------------|-------------------------|----------------------------|----------------------------|----------------------------|
| Epidemic activity by location, ages 13-15 (median, IQR) | 0.011<br>(0.009, 0.013) | 0.010<br>(0.008, 0.012) | 0.009<br>(0.007, 0.011) | 0.008<br>(0.004, 0.012)    | 0.014<br>(0.011, 0.016)    | 0.014<br>(0.011, 0.016)    |
| Epidemic activity by location, ages 25-64 (median, IQR) | 0.014<br>(0.011, 0.017) | 0.011<br>(0.008, 0.014) | 0.009<br>(0.007, 0.011) | 0.007<br>(0.005, 0.012)    | 0.012<br>(0.010, 0.013)    | 0.011<br>(0.010, 0.013)    |
| Epidemic activity by location, ages 65-80 (median, IQR) | 0.010<br>(0.007, 0.014) | 0.007<br>(0.005, 0.010) | 0.005<br>(0.004, 0.008) | 0.0048<br>(0.0034, 0.0060) | 0.0047<br>(0.0038, 0.0056) | 0.0045<br>(0.0036, 0.0051) |
| Minimum months from 2 <sup>nd</sup> dose (N, %)         |                         |                         |                         |                            |                            |                            |
| 5                                                       | --                      | --                      | --                      | 626,434 (70%)              | 15,576 (27%)               | 5,263 (3.9%)               |
| 6                                                       | --                      | --                      | --                      | 248,913 (28%)              | 30,164 (52%)               | 57,420 (43%)               |
| 7                                                       | --                      | --                      | --                      | 21,893 (2.4%)              | 12,525 (21%)               | 69,438 (52%)               |
| 8                                                       | --                      | --                      | --                      | 121 (<0.1%)                | 155 (0.3%)                 | 1,289 (1.0%)               |
| Maximum Months from 2 <sup>nd</sup> dose (N, %)         |                         |                         |                         |                            |                            |                            |
| 5                                                       | --                      | --                      | --                      | 442,102 (49%)              | 1,889 (3.2%)               | 908 (0.7%)                 |
| 6                                                       | --                      | --                      | --                      | 386,639 (43%)              | 21,351 (37%)               | 32,842 (25%)               |
| 7                                                       | --                      | --                      | --                      | 67,415 (7.5%)              | 33,206 (57%)               | 92,295 (69%)               |
| 8                                                       | --                      | --                      | --                      | 1,205 (0.1%)               | 1,974 (3.4%)               | 7,365 (5.5%)               |

\* The late period includes children up to age 11.

Caption: The study population by person-weeks, as counted in each exposure group, for the two periods. This table includes all variables used in the study. The early period was January 17, 2021, to March 28, 2021. The late period was July 11, 2021, to September 30, 2021.

**Supplemental Table 2: Characteristics of Infected and Uninfected Individuals**

| Characteristic               | Early Period           |                             | Late Period            |                             |
|------------------------------|------------------------|-----------------------------|------------------------|-----------------------------|
|                              | Infected<br>(N=11,036) | Not Infected<br>(N=389,697) | Infected<br>(N=13,658) | Not Infected<br>(N=167,649) |
| Age (median, IQR)            | 6<br>(3, 10)           | 6<br>(3, 9)                 | 6<br>(4, 8)            | 5<br>(2, 7)                 |
| Age Group                    |                        |                             |                        |                             |
| 0-2                          | 2,077<br>(19%)         | 79,595<br>(20%)             | 2,078<br>(15%)         | 45,632<br>(27%)             |
| 3-6                          | 3,718<br>(34%)         | 131,512<br>(34%)            | 5,598<br>(41%)         | 69,680<br>(42%)             |
| 7-12*                        | 4,209<br>(38%)         | 145,708<br>(37%)            | 5,982<br>(44%)         | 52,337<br>(31%)             |
| 13-15                        | 1,032<br>(9.4%)        | 32,882<br>(8.4%)            | --                     | --                          |
| Sex                          |                        |                             |                        |                             |
| Male                         | 5,598<br>(51%)         | 200,863<br>(52%)            | 7,098<br>(52%)         | 86,296<br>(51%)             |
| Female                       | 5,438<br>(49%)         | 188,834<br>(48%)            | 6,560<br>(48%)         | 81,353<br>(49%)             |
| Population Group             |                        |                             |                        |                             |
| Arab                         | 2,324<br>(21%)         | 99,233<br>(25%)             | 2,726<br>(20%)         | 29,758<br>(18%)             |
| Ultra-Orthodox Jew           | 1,361<br>(12%)         | 20,371<br>(5.2%)            | 943<br>(6.9%)          | 7,658<br>(4.6%)             |
| General                      | 7,351<br>(67%)         | 270,093<br>(69%)            | 9,989<br>(73%)         | 130,233<br>(78%)            |
| Socioeconomic Status         |                        |                             |                        |                             |
| Low                          | 7,822<br>(71%)         | 215,286<br>(55%)            | 7,721<br>(57%)         | 80,302<br>(48%)             |
| Medium                       | 2,962<br>(27%)         | 159,871<br>(41%)            | 5,596<br>(41%)         | 81,784<br>(49%)             |
| High                         | 252<br>(2.3%)          | 14,540<br>(3.7%)            | 341<br>(2.5%)          | 5,563<br>(3.3%)             |
| Household size (median, IQR) | 5<br>(4,6)             | 5<br>(4,6)                  | 5<br>(4, 5)            | 5<br>(4, 5)                 |
| Household Size               |                        |                             |                        |                             |



|                                 |                |                  |                |                  |
|---------------------------------|----------------|------------------|----------------|------------------|
| 3                               | 462<br>(4.2%)  | 19,665<br>(5.0%) | 457<br>(3.3%)  | 11,479<br>(6.8%) |
| 4                               | 2,456<br>(22%) | 105,093<br>(27%) | 4,052<br>(30%) | 59,814<br>(36%)  |
| 5                               | 3,881<br>(35%) | 153,498<br>(39%) | 5,792<br>(42%) | 67,358<br>(40%)  |
| 6                               | 2,773<br>(25%) | 77,650<br>(20%)  | 2,406<br>(18%) | 22,472<br>(13%)  |
| 7                               | 1,464<br>(13%) | 33,791<br>(8.7%) | 951<br>(7.0%)  | 6,526<br>(3.9%)  |
| City Type                       |                |                  |                |                  |
| Large City                      | 4,022<br>(36%) | 123,865<br>(32%) | 4,596<br>(34%) | 58,395<br>(35%)  |
| Small City                      | 4,451<br>(40%) | 144,809<br>(37%) | 5,504<br>(40%) | 62,198<br>(37%)  |
| Town                            | 1,833<br>(17%) | 74,931<br>(19%)  | 2,285<br>(17%) | 26,532<br>(16%)  |
| Rural                           | 624<br>(5.7%)  | 30,931<br>(7.9%) | 832<br>(6.1%)  | 13,056<br>(7.8%) |
| Kibbutz (Communal<br>Residence) | 106<br>(1.0%)  | 15,161<br>(3.9%) | 441<br>(3.2%)  | 7,468<br>(4.5%)  |
| Obesity                         | 797<br>(7.2%)  | 23,983<br>(6.2%) | 906<br>(6.6%)  | 8,618<br>(5.1%)  |
| Type 2 Diabetes                 | 54<br>(0.5%)   | 1,779<br>(0.5%)  | 48<br>(0.4%)   | 588<br>(0.4%)    |
| Hypertension                    | 23<br>(0.2%)   | 596<br>(0.2%)    | 18<br>(0.1%)   | 220<br>(0.1%)    |
| Cardiovascular Conditions       | 33<br>(0.3%)   | 1,152<br>(0.3%)  | 31<br>(0.2%)   | 429<br>(0.3%)    |
| Pulmonary Disease               | 1,528<br>(14%) | 46,295<br>(12%)  | 1,711<br>(13%) | 17,068<br>(10%)  |
| Active Malignancy               | 11<br>(<0.1%)  | 229<br>(<0.1%)   | 8<br>(<0.1%)   | 127<br>(<0.1%)   |

\* The late period included children up to age 11

Caption: Characteristics of children who did and did not experience the outcome (RT-PCR positive SARS-CoV-2 infection) at each time period. The early period was January 17, 2021, to March 28, 2021. The late period was July 11, 2021, to September 30, 2021.

## Supplemental Table 3: Indirect effect of BNT162B2 mRNA COVID-19

### Vaccine by Age Group and Household Size

| Characteristic | Early period             |                          | Late period              |                         |
|----------------|--------------------------|--------------------------|--------------------------|-------------------------|
|                | One Vaccinated Parent    | Two Vaccinated Parents   | One Vaccinated Parent    | Two Vaccinated Parents  |
| Overall        | 26.0%<br>(14.0%, 36.2%)  | 71.7%<br>(68.6%, 74.6%)  | 20.8%<br>(11.4%, 29.1%)  | 58.1%<br>(53.1%, 62.6%) |
| Age Group      |                          |                          |                          |                         |
| 0-2            | 32.0%<br>(12.5%, 47.2%)  | 77.50%<br>(72.1%, 81.8%) | 28.3%<br>(10.7%, 42.5%)  | 65.9%<br>(56.7%, 73.2%) |
| 3-6            | 23.7%<br>(7.0%, 37.5%)   | 68.5%<br>(63.6%, 72.7%)  | 22.6%<br>(10.8%, 32.8%)  | 57.9%<br>(51.2%, 63.6%) |
| 7-12*          | 21.0%<br>(3.5%, 35.3%)   | 70.3%<br>(65.8%, 74.3%)  | 16.4%<br>(3.6%, 27.5%)   | 55.5%<br>(48.6%, 61.6%) |
| 13-15          | 37.7%<br>(9.6%, 57.1%)   | 74.9%<br>(67.8%, 80.4%)  | --                       | --                      |
| Household Size |                          |                          |                          |                         |
| 3              | 23.2%<br>(-15.9%, 48.8%) | 67.1%<br>(52.4%, 77.3%)  | 23.2%<br>(-17.9%, 50.0%) | 53.9%<br>(29.4%, 69.9%) |
| 4              | 38.6%<br>(19.9%, 52.9%)  | 71.1%<br>(65.3%, 75.9%)  | 21.9%<br>(6.6%, 34.8%)   | 58.9%<br>(50.8%, 65.6%) |
| 5              | 19.8%<br>(-1.9%, 36.8%)  | 75.1%<br>(70.5%, 79.0%)  | 17.5%<br>(1.9%, 30.7%)   | 57.5%<br>(49.5%, 64.3%) |
| 6              | 29.6%<br>(0.45%, 50.1%)  | 69.8%<br>(61.8%, 76.1%)  | 16.9%<br>(-11.4%, 38.1%) | 54.8%<br>(37.8%, 67.2%) |
| 7              | 25.8%<br>(-42.0%, 61.3%) | 62.9%<br>(44.2%, 75.40%) | 38.4%<br>(-14.2%, 66.8%) | 62.1%<br>(35.3%, 77.8%) |

\* The late period included children up to age 11

Caption: The indirect effect of parental vaccination on children's risk of SARS-CoV-2 infection. Vaccine effectiveness is defined as one minus the incidence rate ratio comparing one or two fully vaccinated parents to both parents unvaccinated/un-boostered. The early period was January 17, 2021 to March 28, 2021. The late period was July 11, 2021 to September 30, 2021. During the early period, full vaccination was defined as the receipt of two doses at least 7 days prior (compared to no vaccination) and the dominant variant was Alpha. During the late period, full vaccination was defined as receipt of a third dose at least 7 days prior (compared to receipt of only two doses at least 5 months prior) and the dominant variant was Delta. The numbers in parentheses are 95% confidence intervals. Household sizes include the parents, so for example, a household of size 3 has one child.

### Supplemental Table 4: Negative Control Analysis for Bacterial Diarrhea

|                                | One Vaccinated Parent | Two Vaccinated Parents |
|--------------------------------|-----------------------|------------------------|
|                                | (95% CI)              | (95% CI)               |
| Vaccine effectiveness (95% CI) | -14% (-49%, 13%)      | -16% (-37%, 1.8%)      |

Caption: The reduction in the probability of a child being diagnosed with bacterial diarrhea in a household with one or two fully vaccinated parents compared to a household with no fully vaccinated parents. Bacterial diarrhea is not affected by SARS-CoV-2 vaccination, but is susceptible to the same confounders as the main outcome (SARS-CoV-2 infection), making it a negative control outcome. This analysis was performed in the early period.

**Supplemental Table 5: Variables Used for Adjustment of Models**

| <b>Variable</b>                   | <b>Values</b>                                                                             | <b>Time</b>       |
|-----------------------------------|-------------------------------------------------------------------------------------------|-------------------|
| <b>Individual Level Variables</b> |                                                                                           |                   |
| Sex                               | Male, Female                                                                              | Last before study |
| Age                               | Early Period: 0-2, 3-6, 7-12, 13-15<br>Late Period: 0-2, 3-6, 7-11                        | Last before study |
| Obesity                           | Yes, No                                                                                   | Last before study |
| Active malignancy                 | Yes, No                                                                                   | Last before study |
| Type 2 diabetes                   | Yes, No                                                                                   | Last before study |
| Cardiovascular disease            | Yes, No                                                                                   | Last before study |
| Hypertension                      | Yes, No                                                                                   | Last before study |
| Respiratory disease               | Yes, No                                                                                   | Last before study |
| Smoking                           | Yes, No                                                                                   | Last before study |
| Pregnancy in index member         | Yes/No                                                                                    | Weekly            |
| <b>Household Level Variables*</b> |                                                                                           |                   |
| Parental Vaccination Status**     | Yes/No                                                                                    | Weekly            |
| Residence type                    | Large city, Small City, Town, Rural, Kibbutz                                              | Last before study |
| District                          | Center, Dan-Petach-Tikva, Eylat, Haifa, Jerusalem, North, Sharon-Shomron, South, Tel-Aviv | Last before study |
| Population sector                 | General, Arab, Ultra-Orthodox-Jewish                                                      | Last before study |
| Socioeconomic status              | Low, Medium, High                                                                         | Last before study |
| Household size                    | Integer                                                                                   | Last before study |

|                                               |             |                   |
|-----------------------------------------------|-------------|-------------------|
| Household members age 0-2                     | Integer     | Last before study |
| Household members age 3-6                     | Integer     | Last before study |
| Household members age 7-12                    | Integer     | Last before study |
| Household members age 13-15                   | Integer     | Last before study |
| Household members age 19-40                   | Integer     | Last before study |
| Household members age 41-60                   | Integer     | Last before study |
| Household members age 61-80                   | Integer     | Last before study |
| Male household members                        | Integer     | Last before study |
| Adult smokers in the household                | Integer     | Last before study |
| Obese household members                       | Integer     | Last before study |
| Household members with cardiovascular disease | Integer     | Last before study |
| Household members with hypertension           | Integer     | Last before study |
| Household members with type 2 diabetes        | Integer     | Last before study |
| Household members with respiratory disease    | Integer     | Last before study |
| Household members with active malignancy      | Integer     | Last before study |
| Minimum months from second dose***            | Integer     | Weekly            |
| Maximum months from second dose***            | Integer     | Weekly            |
| Pregnant household member                     | Yes/No      | Weekly            |
| Calendar week for each study period           | Categorical | Weekly            |

|                                           |            |        |
|-------------------------------------------|------------|--------|
| Epidemic activity by location, ages 0-2   | Proportion | Weekly |
| Epidemic activity by location, ages 3-6   | Proportion | Weekly |
| Epidemic activity by location, ages 7-12  | Proportion | Weekly |
| Epidemic activity by location, ages 13-15 | Proportion | Weekly |
| Epidemic activity by location, ages 25-64 | Proportion | Weekly |
| Epidemic activity by location, ages 65-80 | Proportion | Weekly |

---

|                                  |                                                                                                                                                                                                             |  |
|----------------------------------|-------------------------------------------------------------------------------------------------------------------------------------------------------------------------------------------------------------|--|
| Variable Lists                   |                                                                                                                                                                                                             |  |
| Model for indirect effectiveness | Number of fully vaccinated parents (the primary exposure); all individual level variables other than pregnancy status and smoking; all household level variables other than months from second vaccine dose |  |
| Models for direct effectiveness  | Vaccination of the index parent (the primary exposure); All other variables including vaccination of the other parent                                                                                       |  |
| Models for secondary attack rate | Vaccination of the index infected parent (the primary exposure); vaccination of the other parent; Pregnancy status of the index infected parent; All household level variables excluding epidemic activity  |  |

\* In the models for indirect and direct vaccine effectiveness, “household members” refers to the members of the household other than the one currently being observed. In the model for secondary attack rate, it is the overall number among all household members.

\*\* In the model for indirect VE, the number of fully vaccinated parents is the primary exposure. In the model for direct VE, the primary exposure is the vaccination status of the parent currently being observed, and model is adjusted for the vaccination status of the other parent. In the model for secondary attack rate, the primary exposure is the vaccination status of the index infected parent, and model is adjusted for the vaccination status of the other parent.

\*\*\* Time from second dose variables were only used in the late period.

Legend: Variables used for adjustment of the different multivariable models in the study, and the time in which they were extracted.

## Supplemental Table 6: Variable Definitions

| Diagnosis                     | Definition                                                                                                                                                                                                                                                                                                                                                                                                                                                                                                                                                                                                                                                                                                                                 |
|-------------------------------|--------------------------------------------------------------------------------------------------------------------------------------------------------------------------------------------------------------------------------------------------------------------------------------------------------------------------------------------------------------------------------------------------------------------------------------------------------------------------------------------------------------------------------------------------------------------------------------------------------------------------------------------------------------------------------------------------------------------------------------------|
| Vaccination status            | <p>Fully vaccinated, early period: 2<sup>nd</sup> dose + 7 days</p> <p>Fully vaccinated, late period: 3<sup>rd</sup> dose + 7 days, where the 3<sup>rd</sup> dose is given at least 5 months after the second dose.</p> <p>Partially vaccinated, early period: From receipt of the 1<sup>st</sup> dose and until 6 days following receipt of the 2<sup>nd</sup> dose.</p> <p>Partially vaccinated, second period: During the 6 days from receipt of the 3<sup>rd</sup> dose, given at least 5 months after the second dose</p> <p>Unvaccinated, early period: did not receive any Covid-19 vaccine</p> <p>Unvaccinated, late period: received 2<sup>nd</sup> dose at least 5 months prior, but did not receive the 3<sup>rd</sup> dose</p> |
| Recovered                     | <p>As defined by the Israel Ministry of Health, usually as 10 days after the positive test if there were no symptoms for at least 3 days, but there are special cases. The final decision is made by the family physician, who documents it in the health record.</p>                                                                                                                                                                                                                                                                                                                                                                                                                                                                      |
| Epidemic activity by location | <p>The proportion of infections among CHS members in a specific age group in this specific week, in the area and city type of this specific person, across the following age groups: 0-2, 3-6, 7-12, 13-15, 25-64, and 65-80.</p>                                                                                                                                                                                                                                                                                                                                                                                                                                                                                                          |
| Calendar week (early period)  | <p>2021-01-17, 2021-01-24 2021-01-31 2021-02-07, 2021-02-14, 2021-02-21, 2021-02-28, 2021-03-07, 2021-03-14, 2021-03-21</p>                                                                                                                                                                                                                                                                                                                                                                                                                                                                                                                                                                                                                |
| Calendar week (late period)   | <p>2021-07-11, 2021-07-18, 2021-07-25, 2021-08-01, 2021-08-08, 2021-08-15, 2021-08-22, 2021-08-29, 2021-09-05, 2021-09-12, 2021-09-19</p>                                                                                                                                                                                                                                                                                                                                                                                                                                                                                                                                                                                                  |
| Obesity                       | <p>For individuals of age <math>\geq 19</math>, BMI <math>\geq 30</math> kg/m<sup>2</sup> was defined as obese and BMI <math>&lt; 30</math> Kg/m<sup>2</sup> were defined as non-obese.</p> <p>For individuals of age 0-18, individuals in BMI percentile 85% and above were considered obese and individuals in BMI percentiles <math>&lt; 85\%</math> were considered non-obese.</p>                                                                                                                                                                                                                                                                                                                                                     |
| Type 2 Diabetes Mellitus      | <p>One of the following:</p>                                                                                                                                                                                                                                                                                                                                                                                                                                                                                                                                                                                                                                                                                                               |

1. Plasma glucose  $\geq$  200 mg/dl ever
2. HbA1C  $\geq$  7% ever
3. HbA1C  $\geq$  6.5% and plasma glucose  $\geq$  126 mg/dl three months before or after the HbA1C measurement
4. ICD9 diagnosis code 250\* and (HbA1C  $\geq$  6.5% or plasma glucose  $\geq$  126) 12 months before the diagnosis or 3 months after it.
5. Purchase of drug with ATC3 code A10B or A10A and (HbA1C  $\geq$  6.5% or plasma glucose  $\geq$  126) 12 months before the purchase or 3 months after it.
6. ICD9 diagnosis code 250\* and purchase of drug with ATC3 code A10B or A10A 12 months before the diagnosis or 3 months after it.

Hypertension

ICD-9 Diagnosis codes: 401\*; 402\*; 403\*; 404\*; 405\*

ICPC code: K86

Active Malignancy

Defined as a diagnosis with any cancer in the year prior to the index date

ICD-9 codes: 140-209, V10

Internal Billing Codes: Orthopedic Oncologic Operations, External Radiotherapy, Brachytherapy, Bone Marrow Transplant, I-131 Treatment, Oncologic Day Hospitalization, In-Hospitalization Chemotherapy, Post-Oncologic Excision Breast Reconstruction, Urinary Bladder Irrigation w/ Chemotherapy, Somatic FISH Test, RFA of Liver Tumor, Intra-Arterial Chemotherapy, Neck RLND, Radical Prostatectomy, BSO, Whipple Operation

Drugs: 5-Aminolvalulinic Acid, Abiraterone, Afatinib, Alemtuzumab, Altretamine, Aminoglutetimide, Anagrelide, Arsenic Trioxide, Asparaginase, Axitinib, Azacitidine, Bendamustine, Bevacizumab, Bleomycin, Bortezomib, Brentuximab Vedotin, Busulfan, Cabazitaxel, Carboplatin, Carfilzomib, Carmustine, Ceritinib, Cetuximab, Chlorambucil, Chloromethine, Cisplatin, Cladribine, Clofarabine, Crizotinib, Cyclophosphamide, Cytarabine, Dabrafenib, Dacarbazine, Dactinomycin, Dasatinib, Daunorubicine, Decitabine, Degarelix, Diethylstilbestrol, Docetaxel, Doxorubicin, Doxorubicin Liposomal, Epirubicin, Erlotinib, Estramustine, Etoposide, Everolimus, Fludarabine, Flutamide, Formestane, Fotemustine, Fulvestrant,



Gefitinib, Gemcitabine, Gemtuzumab Ozogamicin, Ibrutinib, Idarubicin, Ifosfamide, Imatinib, Ipilimumab, Irinotecan, Lapatinib, Leuprorelin, Lomustine, Medroxyprogesterone, Megestrol, Melphalan, Methotrexate, Miltefosine, Mitomycin, Mitotane, Mitoxantrone, Nelarabine, Nilotinib, Obinutuzumab, Oxaliplatin, Paclitaxel, Panitumumab, Pazopanib, Pegaspargase, Pemetrexed, Pentostatin, Pertuzumab, Ponatinib, Procarbazine, Regorafenib, Rituximab, Romidepsin, Ruxolitinib, Sorafenib, Streptozocin, Sunitinib, Tegafur, Temozolomide, Temsirolimus, Testolactone, Thiotepa, Tioguanine, Topotecan, Trabectedin, Trastuzumab, Trastuzumab Emtansine, Tretinoin, Tegafur/uracil, Vandetanib, Vemurafenib, Vinblastine, Vincristine, Vinorelbine, Visemodegib

Cardiovascular disease

Having at least one diagnosis of the following:

Acute, but ill-defined CVD:

ICD-9 codes: 436\*; 437.1; 437.9

Ischemic Stroke:

ICD-9 codes: 433; 433.\_; 433.\_1; 434\*; 362.31; 362.32; 362.33

ICPC code: K90

Hemorrhagic Stroke:

ICD-9 codes: 430\*; 431\*

Transient Ischemic attack:

ICD-9 codes: 435\*; 362.3\*

Coronary heart disease:

ICD-9 codes: 410\*; 411\*; 413\*; 414\*

Peripheral vascular disease:

ICD-9 codes: 443\*; 440.2\*; 440.3\*; 440.4\*; 440.9\*; 250.7\*; 445.0\*; 443.9

Heart failure:

ICD-9 codes: 428\*

Procedure Codes:

ICD-9 codes: 36.0\*; 36.1\*

Pulmonary Disease

One or more of:

COPD

ICD-9 codes: 491.2\*; 492; 492.0; 492.8; 496\*

ICPC code: R95

Asthma

ICD-9 code: 493\*

Bronchiectasis

ICD-9 codes: 494.0; 494.1

Pulmonary fibrosis

ICD-9 codes: 516.31; 516.30; 516.8; 516.9; 515.0; 501.0

Note: The wildcard \* indicates zero or more of any character. The wildcard \_ indicates any single character

## Supplemental Table 7: Technical Notes

| Item                            | Details                                                                                                                                                                                                                                                                                                                                                                                                                                                                                                                                                                                                                                                                                                                                                                                                                                                                                                                                                                                                                                                                                                                                                                                                                                                                                                                                                                                     |
|---------------------------------|---------------------------------------------------------------------------------------------------------------------------------------------------------------------------------------------------------------------------------------------------------------------------------------------------------------------------------------------------------------------------------------------------------------------------------------------------------------------------------------------------------------------------------------------------------------------------------------------------------------------------------------------------------------------------------------------------------------------------------------------------------------------------------------------------------------------------------------------------------------------------------------------------------------------------------------------------------------------------------------------------------------------------------------------------------------------------------------------------------------------------------------------------------------------------------------------------------------------------------------------------------------------------------------------------------------------------------------------------------------------------------------------|
| Model for Indirect Effect       | <p>Let <math>Y_{ijt}</math> be the infection status of child <math>j</math> in household <math>i</math> in week <math>t</math> (whenever household <math>i</math> contributes follow-up time in week <math>t</math>). Let <math>A_{it} \in \{0,1,2\}</math> be the number of vaccinated parents in household <math>i</math> in week <math>t</math>, and let <math>X_{it}</math> and <math>W_{ijt}</math> be household- and child-level covariates at time <math>t</math> (some covariates are fixed across <math>t</math>, see Supplemental Table 1). The modified Poisson model (34) is then</p> $Y_{ijt} \sim Pois(\lambda_{ijt})$ $\lambda_{ijt} = E[Y_{ijt} A_{it}, X_{it}, W_{ijt}] = \exp(\beta_0 + \beta_1 I\{A_{it} = 1\} + \beta_2 I\{A_{it} = 2\} + \beta_3^T X_{it} + \beta_4^T W_{ijt})$ <p>Under this model, <math>\exp(\beta_1)</math> is the adjusted relative risk of infection comparing having one vaccinated parent to none and <math>\exp(\beta_2)</math> is the adjusted relative risk of infection comparing having two vaccinated parents to none.</p> <p>To estimate the model parameters (the <math>\beta</math>'s), the generalized estimating equations approach under independence correlation structure (33,34) was used, with clusters specified as the household. The sandwich estimator for clustered data (33) is used to estimate the standard error.</p> |
| Model for Direct Effect         | <p>Same as the model for the direct effect, with the design modifications specified in the manuscript.</p>                                                                                                                                                                                                                                                                                                                                                                                                                                                                                                                                                                                                                                                                                                                                                                                                                                                                                                                                                                                                                                                                                                                                                                                                                                                                                  |
| Model for Secondary Attack Rate | <p>Let <math>Y_i</math> be the outcome (whether at least one child in household <math>i</math> was infected on days 3-8 following infection of the index parent), <math>A_i \in \{0, 1\}</math> be the vaccination status of the index parent, and <math>X_i</math> the household-level covariates (see Supplemental Table 1). The logistic regression model is then</p> $Y_i \sim Bernoulli(P_i)$ $Logit(P_i) = \beta_1 A_i + \beta_2^T X_i$ <p>Under this model, <math>\exp(\beta_1)</math> is the adjusted odds ratio of infection, comparing a household in which the index infected parent is vaccinated to a household in which the index infected parent is not vaccinated.</p> <p>The model was estimated using standard Maximum likelihood estimation.</p>                                                                                                                                                                                                                                                                                                                                                                                                                                                                                                                                                                                                                         |

Caption: Technical notes regarding the models and estimation techniques used in the study.

**Supplemental Table 8: Model Output Summaries**

| <b>Variable</b>                       | <b>Estimate</b> | <b>Standard Error</b> | <b>Confidence Interval – Lower Bound</b> | <b>Confidence Interval – Upper Bound</b> |
|---------------------------------------|-----------------|-----------------------|------------------------------------------|------------------------------------------|
| <b>Indirect Effect – Early Period</b> |                 |                       |                                          |                                          |
| (Intercept)                           | -8.221          | 0.707                 | -9.605                                   | -6.836                                   |
| hh_n_fully_vacc_nominal1              | -0.301          | 0.076                 | -0.450                                   | -0.151                                   |
| hh_n_fully_vacc_nominal2              | -1.263          | 0.054                 | -1.370                                   | -1.157                                   |
| hh_size                               | 0.133           | 0.040                 | 0.054                                    | 0.212                                    |
| week_start2021-01-24                  | 0.083           | 0.065                 | -0.044                                   | 0.210                                    |
| week_start2021-01-31                  | 0.273           | 0.076                 | 0.124                                    | 0.423                                    |
| week_start2021-02-07                  | 0.376           | 0.083                 | 0.214                                    | 0.539                                    |
| week_start2021-02-14                  | 0.445           | 0.100                 | 0.249                                    | 0.640                                    |
| week_start2021-02-21                  | 0.769           | 0.100                 | 0.573                                    | 0.965                                    |
| week_start2021-02-28                  | 1.018           | 0.100                 | 0.822                                    | 1.215                                    |
| week_start2021-03-07                  | 0.543           | 0.115                 | 0.318                                    | 0.767                                    |
| week_start2021-03-14                  | 0.001           | 0.125                 | -0.244                                   | 0.245                                    |
| week_start2021-03-21                  | -0.525          | 0.141                 | -0.801                                   | -0.249                                   |
| male                                  | -0.049          | 0.024                 | -0.095                                   | -0.003                                   |
| age_group1315                         | 0.368           | 0.050                 | 0.269                                    | 0.467                                    |
| age_group1618                         | -30.787         | 17.001                | -64.108                                  | 2.535                                    |
| age_group36                           | 0.083           | 0.038                 | 0.009                                    | 0.157                                    |
| age_group712                          | 0.215           | 0.035                 | 0.145                                    | 0.284                                    |
| district_code2                        | 0.097           | 0.136                 | -0.170                                   | 0.364                                    |
| district_code4                        | 0.128           | 0.092                 | -0.052                                   | 0.309                                    |
| district_code5                        | 0.321           | 0.090                 | 0.144                                    | 0.498                                    |
| district_code7                        | 0.188           | 0.090                 | 0.012                                    | 0.365                                    |
| district_code9                        | 0.234           | 0.086                 | 0.066                                    | 0.403                                    |
| district_code12                       | 0.334           | 0.105                 | 0.128                                    | 0.540                                    |
| district_code15                       | 0.171           | 0.092                 | -0.010                                   | 0.352                                    |
| district_code16                       | 0.905           | 0.268                 | 0.381                                    | 1.430                                    |
| city_type_rural                       | -0.013          | 0.097                 | -0.204                                   | 0.178                                    |
| city_type_large_city                  | -0.044          | 0.062                 | -0.166                                   | 0.078                                    |
| city_type_small_city                  | -0.076          | 0.055                 | -0.183                                   | 0.031                                    |
| city_type_kibbutz                     | -0.287          | 0.163                 | -0.607                                   | 0.033                                    |
| sector2                               | 1.192           | 0.071                 | 1.052                                    | 1.332                                    |
| sector9                               | 0.894           | 0.055                 | 0.786                                    | 1.002                                    |
| ses                                   | -0.268          | 0.042                 | -0.351                                   | -0.185                                   |
| obese                                 | 0.158           | 0.044                 | 0.072                                    | 0.245                                    |
| active_malignancy                     | 0.175           | 0.449                 | -0.705                                   | 1.056                                    |
| diabetes                              | -0.100          | 0.173                 | -0.439                                   | 0.239                                    |
| cvd_history                           | -0.120          | 0.226                 | -0.564                                   | 0.323                                    |
| htn_history                           | 0.446           | 0.243                 | -0.029                                   | 0.922                                    |
| cpd_history                           | 0.180           | 0.034                 | 0.113                                    | 0.248                                    |
| hh_n_males                            | -0.031          | 0.023                 | -0.076                                   | 0.013                                    |
| hh_n_adult_smokers                    | -0.109          | 0.026                 | -0.159                                   | -0.059                                   |
| hh_n_obese                            | 0.086           | 0.024                 | 0.040                                    | 0.132                                    |
| hh_pregnant                           | 0.069           | 0.060                 | -0.048                                   | 0.186                                    |
| hh_n_cvd                              | 0.030           | 0.077                 | -0.121                                   | 0.182                                    |
| hh_n_cpd                              | 0.067           | 0.024                 | 0.021                                    | 0.114                                    |
| hh_n_dm                               | 0.069           | 0.070                 | -0.069                                   | 0.206                                    |

|                 |        |        |         |        |
|-----------------|--------|--------|---------|--------|
| hh_n_HTN        | 0.109  | 0.058  | -0.004  | 0.221  |
| hh_n_malig      | -0.106 | 0.203  | -0.503  | 0.291  |
| hh_n_age_02     | -0.102 | 0.044  | -0.188  | -0.015 |
| hh_n_age_36     | -0.106 | 0.041  | -0.186  | -0.025 |
| hh_n_age_712    | -0.079 | 0.042  | -0.161  | 0.003  |
| hh_n_age_1940   | 0.300  | 0.328  | -0.343  | 0.942  |
| hh_n_age_4160   | 0.180  | 0.328  | -0.463  | 0.824  |
| prevalence_02   | -3.507 | 16.878 | -36.588 | 29.573 |
| prevalence_36   | 15.607 | 14.792 | -13.384 | 44.598 |
| prevalence_712  | 38.003 | 15.207 | 8.198   | 67.808 |
| prevalence_1315 | 21.077 | 11.435 | -1.337  | 43.490 |
| prevalence_2564 | 1.554  | 18.961 | -35.610 | 38.718 |
| prevalence_6580 | 28.627 | 10.850 | 7.361   | 49.892 |

---

**Indirect Effect – Late Period**

---

|                                  |        |       |         |        |
|----------------------------------|--------|-------|---------|--------|
| (Intercept)                      | -7.549 | 2.261 | -11.980 | -3.117 |
| hh_n_booster_fully_vacc_nominal1 | -0.233 | 0.057 | -0.344  | -0.121 |
| hh_n_booster_fully_vacc_nominal2 | -0.871 | 0.057 | -0.983  | -0.758 |
| hh_size                          | -0.055 | 0.720 | -1.467  | 1.357  |
| week_start2021-07-18             | 0.584  | 0.184 | 0.224   | 0.944  |
| week_start2021-07-25             | 0.705  | 0.181 | 0.350   | 1.060  |
| week_start2021-08-01             | 1.196  | 0.173 | 0.857   | 1.535  |
| week_start2021-08-08             | 1.355  | 0.172 | 1.018   | 1.693  |
| week_start2021-08-15             | 1.543  | 0.177 | 1.196   | 1.890  |
| week_start2021-08-22             | 1.651  | 0.184 | 1.291   | 2.011  |
| week_start2021-08-29             | 1.731  | 0.190 | 1.358   | 2.103  |
| week_start2021-09-05             | 1.818  | 0.188 | 1.450   | 2.185  |
| week_start2021-09-12             | 1.798  | 0.186 | 1.433   | 2.163  |
| week_start2021-09-19             | 1.346  | 0.188 | 0.977   | 1.715  |
| male                             | 0.022  | 0.020 | -0.017  | 0.060  |
| age_group36                      | 0.488  | 0.032 | 0.425   | 0.552  |
| age_group711                     | 0.746  | 0.031 | 0.685   | 0.807  |
| district_code2                   | 0.533  | 0.093 | 0.351   | 0.715  |
| district_code4                   | 0.296  | 0.086 | 0.127   | 0.464  |
| district_code5                   | 0.542  | 0.083 | 0.379   | 0.705  |
| district_code7                   | 0.399  | 0.091 | 0.221   | 0.576  |
| district_code9                   | 0.371  | 0.086 | 0.202   | 0.540  |
| district_code12                  | 0.423  | 0.084 | 0.259   | 0.587  |
| district_code15                  | 0.366  | 0.088 | 0.194   | 0.538  |
| district_code16                  | 0.559  | 0.191 | 0.184   | 0.934  |
| city_type_rural                  | -0.176 | 0.075 | -0.323  | -0.028 |
| city_type_large_city             | -0.030 | 0.054 | -0.137  | 0.077  |
| city_type_small_city             | -0.025 | 0.046 | -0.114  | 0.065  |
| city_type_kibbutz                | -0.099 | 0.094 | -0.283  | 0.084  |
| sector2                          | 0.440  | 0.073 | 0.296   | 0.584  |
| sector9                          | 0.159  | 0.043 | 0.075   | 0.243  |
| ses                              | -0.236 | 0.032 | -0.298  | -0.174 |
| obese                            | 0.048  | 0.040 | -0.031  | 0.126  |
| active_malignancy                | 0.077  | 0.357 | -0.624  | 0.777  |
| diabetes                         | -0.089 | 0.157 | -0.396  | 0.218  |
| cvd_history                      | -0.146 | 0.200 | -0.538  | 0.245  |
| htn_history                      | 0.162  | 0.250 | -0.327  | 0.652  |
| cpd_history                      | 0.076  | 0.029 | 0.018   | 0.133  |
| hh_n_males                       | 0.030  | 0.019 | -0.007  | 0.066  |
| hh_n_adult_smokers               | 0.012  | 0.020 | -0.026  | 0.051  |

|                          |         |        |         |         |
|--------------------------|---------|--------|---------|---------|
| hh_n_obese               | 0.021   | 0.020  | -0.018  | 0.060   |
| hh_pregnant              | 0.111   | 0.054  | 0.006   | 0.217   |
| hh_n_cvd                 | 0.029   | 0.064  | -0.097  | 0.155   |
| hh_n_cpd                 | -0.011  | 0.021  | -0.052  | 0.029   |
| hh_n_dm                  | 0.034   | 0.062  | -0.088  | 0.156   |
| hh_n_HTN                 | 0.084   | 0.046  | -0.005  | 0.174   |
| hh_n_malig               | 0.079   | 0.151  | -0.216  | 0.375   |
| hh_n_age_02              | 0.139   | 0.721  | -1.274  | 1.551   |
| hh_n_age_36              | 0.237   | 0.720  | -1.174  | 1.648   |
| hh_n_age_1940            | -0.290  | 0.306  | -0.891  | 0.310   |
| hh_n_age_4160            | -0.335  | 0.307  | -0.936  | 0.267   |
| prevalence_02            | -29.928 | 9.335  | -48.225 | -11.631 |
| prevalence_36            | -2.463  | 5.609  | -13.456 | 8.530   |
| prevalence_712           | 35.444  | 4.606  | 26.416  | 44.472  |
| prevalence_1315          | 13.613  | 6.406  | 1.057   | 26.168  |
| prevalence_2564          | 19.620  | 16.045 | -11.828 | 51.067  |
| prevalence_6580          | -12.309 | 13.832 | -39.420 | 14.802  |
| hh_n_age_711             | 0.338   | 0.720  | -1.073  | 1.750   |
| hh_min_months_from_dose2 | -0.004  | 0.030  | -0.064  | 0.055   |
| hh_max_months_from_dose2 | 0.112   | 0.028  | 0.057   | 0.167   |

---

**Direct Effect – Early Period**

---

|                      |        |       |        |        |
|----------------------|--------|-------|--------|--------|
| (Intercept)          | -6.712 | 0.548 | -7.785 | -5.639 |
| fully_vacc_nominal1  | -2.878 | 0.098 | -3.069 | -2.687 |
| hh_size              | 0.116  | 0.036 | 0.045  | 0.187  |
| week_start2021-01-24 | -0.028 | 0.053 | -0.132 | 0.076  |
| week_start2021-01-31 | 0.241  | 0.062 | 0.119  | 0.363  |
| week_start2021-02-07 | 0.211  | 0.072 | 0.070  | 0.353  |
| week_start2021-02-14 | 0.374  | 0.089 | 0.201  | 0.548  |
| week_start2021-02-21 | 0.633  | 0.089 | 0.458  | 0.808  |
| week_start2021-02-28 | 0.619  | 0.097 | 0.429  | 0.810  |
| week_start2021-03-07 | 0.292  | 0.115 | 0.067  | 0.518  |
| week_start2021-03-14 | -0.303 | 0.135 | -0.567 | -0.039 |
| week_start2021-03-21 | -0.714 | 0.151 | -1.011 | -0.418 |
| male                 | -0.020 | 0.027 | -0.072 | 0.032  |
| age_group4160        | -0.113 | 0.037 | -0.186 | -0.040 |
| age_group6180        | 0.034  | 0.453 | -0.854 | 0.923  |
| district_code2       | 0.061  | 0.127 | -0.188 | 0.310  |
| district_code4       | 0.094  | 0.088 | -0.079 | 0.266  |
| district_code5       | 0.135  | 0.083 | -0.028 | 0.298  |
| district_code7       | 0.251  | 0.083 | 0.088  | 0.414  |
| district_code9       | 0.092  | 0.082 | -0.068 | 0.253  |
| district_code12      | 0.196  | 0.100 | 0.000  | 0.393  |
| district_code15      | 0.098  | 0.082 | -0.064 | 0.259  |
| district_code16      | 0.500  | 0.300 | -0.088 | 1.088  |
| city_type_rural      | 0.028  | 0.092 | -0.153 | 0.209  |
| city_type_large_city | -0.017 | 0.057 | -0.129 | 0.095  |
| city_type_small_city | -0.063 | 0.049 | -0.158 | 0.033  |
| city_type_kibbutz    | -0.466 | 0.204 | -0.866 | -0.067 |
| sector2              | 0.863  | 0.062 | 0.742  | 0.984  |
| sector9              | 0.492  | 0.046 | 0.402  | 0.582  |
| ses                  | -0.285 | 0.039 | -0.361 | -0.208 |
| pregnant             | 0.179  | 0.052 | 0.078  | 0.281  |
| adult_smoker         | -0.277 | 0.028 | -0.331 | -0.222 |
| obese                | 0.094  | 0.033 | 0.030  | 0.158  |

|                    |         |        |         |        |
|--------------------|---------|--------|---------|--------|
| active_malignancy  | -0.029  | 0.234  | -0.487  | 0.429  |
| diabetes           | -0.032  | 0.088  | -0.204  | 0.140  |
| cvd_history        | 0.048   | 0.087  | -0.121  | 0.218  |
| htn_history        | 0.165   | 0.060  | 0.047   | 0.282  |
| cpd_history        | -0.053  | 0.045  | -0.141  | 0.036  |
| hh_n_males         | -0.032  | 0.019  | -0.070  | 0.005  |
| hh_n_adult_smokers | -0.068  | 0.027  | -0.121  | -0.016 |
| hh_n_obese         | 0.063   | 0.023  | 0.017   | 0.108  |
| hh_pregnant        | 0.145   | 0.056  | 0.036   | 0.255  |
| hh_n_cvd           | 0.023   | 0.080  | -0.133  | 0.180  |
| hh_n_cpd           | 0.110   | 0.022  | 0.068   | 0.153  |
| hh_n_dm            | 0.078   | 0.070  | -0.060  | 0.216  |
| hh_n_HTN           | 0.108   | 0.059  | -0.007  | 0.223  |
| hh_n_malig         | -0.081  | 0.257  | -0.584  | 0.422  |
| hh_n_age_02        | -0.032  | 0.039  | -0.109  | 0.045  |
| hh_n_age_36        | -0.102  | 0.037  | -0.175  | -0.028 |
| hh_n_age_712       | -0.077  | 0.039  | -0.153  | -0.001 |
| hh_n_age_1940      | 0.359   | 0.500  | -0.622  | 1.339  |
| hh_n_age_4160      | 0.269   | 0.501  | -0.713  | 1.250  |
| prevalence_02      | -17.408 | 16.290 | -49.335 | 14.518 |
| prevalence_36      | -8.017  | 17.852 | -43.007 | 26.973 |
| prevalence_712     | 39.585  | 12.310 | 15.457  | 63.713 |
| prevalence_1315    | 0.232   | 10.594 | -20.531 | 20.995 |
| prevalence_2564    | 42.021  | 17.891 | 6.956   | 77.087 |
| prevalence_6580    | 7.998   | 11.234 | -14.020 | 30.015 |
| hh_n_fully_vacc    | -0.321  | 0.067  | -0.453  | -0.189 |

---

**Direct Effect – Late Period**

---

|                             |        |       |        |        |
|-----------------------------|--------|-------|--------|--------|
| (Intercept)                 | -8.488 | 0.488 | -9.444 | -7.532 |
| booster_fully_vacc_nominal1 | -1.987 | 0.096 | -2.174 | -1.799 |
| hh_size                     | 0.304  | 0.022 | 0.261  | 0.348  |
| week_start2021-07-18        | 0.451  | 0.213 | 0.035  | 0.868  |
| week_start2021-07-25        | 0.891  | 0.200 | 0.499  | 1.283  |
| week_start2021-08-01        | 1.140  | 0.194 | 0.759  | 1.521  |
| week_start2021-08-08        | 1.438  | 0.192 | 1.061  | 1.815  |
| week_start2021-08-15        | 1.792  | 0.196 | 1.407  | 2.177  |
| week_start2021-08-22        | 1.981  | 0.204 | 1.581  | 2.381  |
| week_start2021-08-29        | 2.096  | 0.212 | 1.681  | 2.510  |
| week_start2021-09-05        | 1.992  | 0.210 | 1.579  | 2.404  |
| week_start2021-09-12        | 1.953  | 0.209 | 1.543  | 2.362  |
| week_start2021-09-19        | 1.693  | 0.211 | 1.279  | 2.108  |
| male                        | -0.128 | 0.028 | -0.183 | -0.072 |
| age_group4160               | -0.051 | 0.037 | -0.124 | 0.022  |
| age_group6180               | 1.085  | 0.369 | 0.361  | 1.809  |
| district_code2              | 0.480  | 0.102 | 0.281  | 0.679  |
| district_code4              | 0.331  | 0.095 | 0.145  | 0.517  |
| district_code5              | 0.478  | 0.092 | 0.297  | 0.658  |
| district_code7              | 0.424  | 0.103 | 0.223  | 0.626  |
| district_code9              | 0.367  | 0.096 | 0.178  | 0.555  |
| district_code12             | 0.407  | 0.095 | 0.222  | 0.593  |
| district_code15             | 0.300  | 0.099 | 0.106  | 0.493  |
| district_code16             | 0.797  | 0.201 | 0.403  | 1.191  |
| city_type_rural             | -0.122 | 0.084 | -0.286 | 0.041  |
| city_type_large_city        | 0.061  | 0.060 | -0.056 | 0.179  |

|                          |         |        |         |        |
|--------------------------|---------|--------|---------|--------|
| city_type_small_city     | 0.018   | 0.052  | -0.085  | 0.121  |
| city_type_kibbutz        | -0.211  | 0.113  | -0.432  | 0.010  |
| sector2                  | 0.698   | 0.081  | 0.540   | 0.856  |
| sector9                  | 0.499   | 0.051  | 0.400   | 0.599  |
| ses                      | -0.242  | 0.035  | -0.310  | -0.174 |
| pregnant                 | 0.230   | 0.060  | 0.112   | 0.348  |
| adult_smoker             | -0.125  | 0.027  | -0.178  | -0.072 |
| obese                    | 0.004   | 0.036  | -0.067  | 0.075  |
| active_malignancy        | 0.317   | 0.185  | -0.046  | 0.681  |
| diabetes                 | -0.120  | 0.102  | -0.321  | 0.080  |
| cvd_history              | -0.003  | 0.094  | -0.187  | 0.182  |
| htn_history              | 0.157   | 0.061  | 0.037   | 0.278  |
| cpd_history              | 0.021   | 0.043  | -0.064  | 0.106  |
| hh_n_males               | 0.000   | 0.019  | -0.038  | 0.038  |
| hh_n_adult_smokers       | -0.022  | 0.026  | -0.074  | 0.029  |
| hh_n_obese               | -0.039  | 0.026  | -0.089  | 0.011  |
| hh_pregnant              | 0.174   | 0.068  | 0.040   | 0.307  |
| hh_n_cvd                 | -0.068  | 0.086  | -0.237  | 0.101  |
| hh_n_cpd                 | 0.053   | 0.022  | 0.010   | 0.097  |
| hh_n_dm                  | -0.008  | 0.081  | -0.167  | 0.151  |
| hh_n_HTN                 | 0.060   | 0.061  | -0.059  | 0.180  |
| hh_n_malig               | 0.167   | 0.166  | -0.159  | 0.492  |
| hh_n_age_02              | -0.130  | 0.028  | -0.185  | -0.075 |
| hh_n_age_36              | -0.059  | 0.025  | -0.108  | -0.010 |
| hh_n_age_1940            | -0.524  | 0.417  | -1.342  | 0.294  |
| hh_n_age_4160            | -0.559  | 0.418  | -1.378  | 0.259  |
| prevalence_02            | -15.539 | 10.754 | -36.617 | 5.540  |
| prevalence_36            | 5.441   | 6.311  | -6.927  | 17.810 |
| prevalence_712           | 20.321  | 5.919  | 8.720   | 31.921 |
| prevalence_1315          | 5.337   | 8.449  | -11.224 | 21.898 |
| prevalence_2564          | -0.088  | 18.443 | -36.236 | 36.059 |
| prevalence_6580          | -3.544  | 15.714 | -34.344 | 27.255 |
| hh_min_months_from_dose2 | 0.017   | 0.120  | -0.217  | 0.252  |
| hh_max_months_from_dose2 | 0.099   | 0.122  | -0.140  | 0.338  |
| hh_n_booster_fully_vacc  | -0.537  | 0.072  | -0.679  | -0.396 |

---

**Secondary Attack Rate – Early Period**

|                                     |         |         |        |        |
|-------------------------------------|---------|---------|--------|--------|
| (Intercept)                         | -28.623 | 754.033 | NA     | 49.476 |
| hh_size                             | 0.243   | 0.125   | -0.006 | 0.486  |
| hh_first_covid_city_type_rural      | -0.458  | 0.322   | -1.120 | 0.152  |
| hh_first_covid_city_type_large_city | -0.002  | 0.179   | -0.351 | 0.352  |
| hh_first_covid_city_type_small_city | -0.093  | 0.161   | -0.406 | 0.224  |
| hh_first_covid_city_type_kibbutz    | -0.092  | 0.694   | -1.641 | 1.167  |
| hh_first_covid_ses                  | -0.222  | 0.123   | -0.466 | 0.015  |
| hh_first_covid_district_code2       | -0.233  | 0.332   | -0.907 | 0.401  |
| hh_first_covid_district_code4       | 0.075   | 0.207   | -0.332 | 0.480  |
| hh_first_covid_district_code5       | -0.069  | 0.215   | -0.493 | 0.353  |
| hh_first_covid_district_code7       | 0.109   | 0.199   | -0.281 | 0.500  |
| hh_first_covid_district_code9       | 0.050   | 0.204   | -0.350 | 0.449  |
| hh_first_covid_district_code12      | 0.161   | 0.210   | -0.252 | 0.573  |
| hh_first_covid_district_code15      | 0.159   | 0.228   | -0.290 | 0.605  |
| hh_first_covid_district_code16      | 2.498   | 0.925   | 0.795  | 4.581  |
| hh_first_covid_sector2              | 0.804   | 0.211   | 0.389  | 1.215  |
| hh_first_covid_sector9              | 0.807   | 0.148   | 0.518  | 1.099  |
| hh_total_n_males                    | -0.045  | 0.065   | -0.172 | 0.081  |



|                          |        |         |         |        |
|--------------------------|--------|---------|---------|--------|
| hh_total_n_adult_smokers | -0.036 | 0.078   | -0.190  | 0.117  |
| hh_total_n_obese         | 0.045  | 0.071   | -0.095  | 0.182  |
| hh_total_n_cvd           | -0.270 | 0.232   | -0.747  | 0.166  |
| hh_total_n_cpd           | 0.092  | 0.066   | -0.040  | 0.221  |
| hh_total_n_dm            | -0.209 | 0.214   | -0.647  | 0.195  |
| hh_total_n_HTN           | 0.375  | 0.173   | 0.029   | 0.711  |
| hh_total_n_malig         | 0.539  | 0.544   | -0.620  | 1.586  |
| hh_total_n_o2            | -0.109 | 0.137   | -0.375  | 0.162  |
| hh_total_n_36            | -0.137 | 0.129   | -0.388  | 0.118  |
| hh_total_n_712           | -0.012 | 0.134   | -0.271  | 0.253  |
| hh_total_n_1940          | 13.179 | 377.017 | -25.892 | NA     |
| hh_total_n_4160          | 13.027 | 377.017 | -26.026 | NA     |
| week_start2021-01-24     | 0.163  | 0.175   | -0.181  | 0.506  |
| week_start2021-01-31     | 0.134  | 0.176   | -0.212  | 0.480  |
| week_start2021-02-07     | -0.006 | 0.193   | -0.386  | 0.369  |
| week_start2021-02-14     | 0.363  | 0.199   | -0.030  | 0.752  |
| week_start2021-02-21     | 0.115  | 0.213   | -0.308  | 0.530  |
| week_start2021-02-28     | -0.024 | 0.236   | -0.496  | 0.433  |
| week_start2021-03-07     | -0.416 | 0.287   | -1.002  | 0.129  |
| week_start2021-03-14     | -0.464 | 0.432   | -1.392  | 0.325  |
| pregnant                 | -0.139 | 0.214   | -0.571  | 0.269  |
| hh_pregnant              | -0.403 | 0.250   | -0.914  | 0.069  |
| hh_n_fully_vacc          | 0.174  | 0.261   | -0.351  | 0.673  |
| index_fully_vaccl        | -1.276 | 0.448   | -2.233  | -0.456 |

---

**Secondary Attack Rate – Late Period**

---

|                                     |         |         |         |        |
|-------------------------------------|---------|---------|---------|--------|
| (Intercept)                         | -28.611 | 716.711 | NA      | 53.023 |
| hh_first_covid_months_from_dose2    | 0.029   | 0.088   | -0.143  | 0.202  |
| hh_size                             | 0.361   | 0.083   | 0.199   | 0.524  |
| hh_first_covid_city_type_rural      | -0.320  | 0.279   | -0.874  | 0.221  |
| hh_first_covid_city_type_large_city | -0.216  | 0.197   | -0.601  | 0.172  |
| hh_first_covid_city_type_small_city | 0.036   | 0.178   | -0.312  | 0.388  |
| hh_first_covid_city_type_kibbutz    | -0.355  | 0.411   | -1.193  | 0.427  |
| hh_first_covid_ses                  | 0.001   | 0.111   | -0.217  | 0.219  |
| hh_first_covid_district_code2       | 0.349   | 0.293   | -0.223  | 0.926  |
| hh_first_covid_district_code4       | -0.022  | 0.269   | -0.547  | 0.510  |
| hh_first_covid_district_code5       | -0.172  | 0.259   | -0.676  | 0.342  |
| hh_first_covid_district_code7       | -0.237  | 0.253   | -0.730  | 0.266  |
| hh_first_covid_district_code9       | -0.106  | 0.257   | -0.607  | 0.403  |
| hh_first_covid_district_code12      | 0.287   | 0.255   | -0.208  | 0.793  |
| hh_first_covid_district_code15      | 0.099   | 0.285   | -0.456  | 0.661  |
| hh_first_covid_district_code16      | 0.792   | 0.550   | -0.294  | 1.885  |
| hh_first_covid_sector2              | -0.033  | 0.318   | -0.668  | 0.582  |
| hh_first_covid_sector9              | 0.532   | 0.189   | 0.165   | 0.908  |
| hh_total_n_males                    | 0.018   | 0.070   | -0.119  | 0.156  |
| hh_total_n_adult_smokers            | -0.081  | 0.077   | -0.233  | 0.070  |
| hh_total_n_obese                    | 0.045   | 0.082   | -0.116  | 0.204  |
| hh_total_n_cvd                      | -0.167  | 0.253   | -0.683  | 0.315  |
| hh_total_n_cpd                      | -0.040  | 0.076   | -0.189  | 0.107  |
| hh_total_n_dm                       | -0.217  | 0.280   | -0.787  | 0.316  |
| hh_total_n_HTN                      | 0.059   | 0.183   | -0.306  | 0.412  |
| hh_total_n_malig                    | 0.474   | 0.457   | -0.454  | 1.359  |
| hh_total_n_o2                       | -0.221  | 0.103   | -0.423  | -0.020 |
| hh_total_n_36                       | 0.111   | 0.094   | -0.072  | 0.295  |
| hh_total_n_1940                     | 12.628  | 358.355 | -28.402 | NA     |

|                          |        |         |         |        |
|--------------------------|--------|---------|---------|--------|
| hh_total_n_4160          | 12.621 | 358.355 | -28.390 | NA     |
| week_start2021-07-18     | -0.451 | 0.725   | -1.881  | 1.004  |
| week_start2021-07-25     | -0.353 | 0.626   | -1.546  | 0.944  |
| week_start2021-08-01     | 0.118  | 0.587   | -0.986  | 1.355  |
| week_start2021-08-08     | 0.006  | 0.577   | -1.076  | 1.226  |
| week_start2021-08-15     | 0.330  | 0.562   | -0.719  | 1.526  |
| week_start2021-08-22     | 0.315  | 0.566   | -0.741  | 1.517  |
| week_start2021-08-29     | 0.254  | 0.567   | -0.804  | 1.458  |
| week_start2021-09-05     | 0.446  | 0.570   | -0.621  | 1.656  |
| week_start2021-09-12     | 0.110  | 0.582   | -0.981  | 1.339  |
| week_start2021-09-19     | -0.069 | 0.609   | -1.220  | 1.204  |
| pregnant                 | -0.131 | 0.250   | -0.638  | 0.346  |
| hh_pregnant              | -0.275 | 0.277   | -0.839  | 0.251  |
| hh_n_booster_fully_vacc  | -0.417 | 0.368   | -1.181  | 0.274  |
| hh_min_months_from_dose2 | 0.061  | 0.096   | -0.127  | 0.248  |
| hh_max_months_from_dose2 | NA     | NA      | NA      | NA     |
| index_fully_vacci        | -1.588 | 0.424   | -2.504  | -0.820 |

Caption: Output summaries from the models used in the study.

## References and Notes

1. N. Zhu, D. Zhang, W. Wang, X. Li, B. Yang, J. Song, X. Zhao, B. Huang, W. Shi, R. Lu, P. Niu, F. Zhan, X. Ma, D. Wang, W. Xu, G. Wu, G. F. Gao, W. Tan, China Novel Coronavirus Investigating and Research Team, A Novel Coronavirus from Patients with Pneumonia in China, 2019. *N. Engl. J. Med.* **382**, 727–733 (2020). [doi:10.1056/NEJMoa2001017](https://doi.org/10.1056/NEJMoa2001017) [Medline](#)
2. Center for Systems Science and Engineering (CSSE) at Johns Hopkins University (JHU), “COVID-19 Dashboard” (2022); <https://coronavirus.jhu.edu/map.html>.
3. M. E. Halloran, M. Haber, I. M. Longini Jr., C. J. Struchiner, Direct and indirect effects in vaccine efficacy and effectiveness. *Am. J. Epidemiol.* **133**, 323–331 (1991). [doi:10.1093/oxfordjournals.aje.a115884](https://doi.org/10.1093/oxfordjournals.aje.a115884) [Medline](#)
4. Z. Wang, W. Ma, X. Zheng, G. Wu, R. Zhang, Household transmission of SARS-CoV-2. *J. Infect.* **81**, 179–182 (2020). [doi:10.1016/j.jinf.2020.03.040](https://doi.org/10.1016/j.jinf.2020.03.040) [Medline](#)
5. K. Danis, O. Epaulard, T. Bénet, A. Gaymard, S. Campoy, E. Botelho-Nevers, M. Bouscambert-Duchamp, G. Spaccaverri, F. Ader, A. Mailles, Z. Boudalaa, V. Tolsma, J. Berra, S. Vaux, E. Forestier, C. Landelle, E. Fougere, A. Thabuis, P. Berthelot, R. Veil, D. Levy-Bruhl, C. Chidiac, B. Lina, B. Coignard, C. Saura, Investigation Team, Cluster of Coronavirus Disease 2019 (COVID-19) in the French Alps, February 2020. *Clin. Infect. Dis.* **71**, 825–832 (2020). [doi:10.1093/cid/ciaa424](https://doi.org/10.1093/cid/ciaa424) [Medline](#)
6. I. Dattner, Y. Goldberg, G. Katriel, R. Yaari, N. Gal, Y. Miron, A. Ziv, R. Sheffer, Y. Hamo, A. Huppert, The role of children in the spread of COVID-19: Using household data from Bnei Brak, Israel, to estimate the relative susceptibility and infectivity of children. *PLOS Comput. Biol.* **17**, e1008559 (2021). [doi:10.1371/journal.pcbi.1008559](https://doi.org/10.1371/journal.pcbi.1008559) [Medline](#)
7. Z. J. Madewell, Y. Yang, I. M. Longini Jr., M. E. Halloran, N. E. Dean, Factors Associated With Household Transmission of SARS-CoV-2: An Updated Systematic Review and Meta-analysis. *JAMA Netw. Open* **4**, e2122240 (2021). [doi:10.1001/jamanetworkopen.2021.22240](https://doi.org/10.1001/jamanetworkopen.2021.22240) [Medline](#)
8. F. P. Polack, S. J. Thomas, N. Kitchin, J. Absalon, A. Gurtman, S. Lockhart, J. L. Perez, G. Pérez Marc, E. D. Moreira, C. Zerbini, R. Bailey, K. A. Swanson, S. Roychoudhury, K. Koury, P. Li, W. V. Kalina, D. Cooper, R. W. Frenck Jr., L. L. Hammitt, Ö. Türeci, H. Nell, A. Schaefer, S. Ünal, D. B. Tresnan, S. Mather, P. R. Dormitzer, U. Şahin, K. U. Jansen, W. C. Gruber, C4591001 Clinical Trial Group, Safety and Efficacy of the BNT162b2 mRNA Covid-19 Vaccine. *N. Engl. J. Med.* **383**, 2603–2615 (2020). [doi:10.1056/NEJMoa2034577](https://doi.org/10.1056/NEJMoa2034577) [Medline](#)
9. N. Dagan, N. Barda, E. Kepten, O. Miron, S. Perchik, M. A. Katz, M. A. Hernán, M. Lipsitch, B. Reis, R. D. Balicer, BNT162b2 mRNA Covid-19 Vaccine in a Nationwide Mass Vaccination Setting. *N. Engl. J. Med.* **384**, 1412–1423 (2021). [doi:10.1056/NEJMoa2101765](https://doi.org/10.1056/NEJMoa2101765) [Medline](#)
10. E. J. Haas, F. J. Angulo, J. M. McLaughlin, E. Anis, S. R. Singer, F. Khan, N. Brooks, M. Smaja, G. Mircus, K. Pan, J. Southern, D. L. Swerdlow, L. Jodar, Y. Levy, S. Alroy-Preis, Impact and effectiveness of mRNA BNT162b2 vaccine against SARS-CoV-2 infections and COVID-19 cases, hospitalisations, and deaths following a nationwide

- vaccination campaign in Israel: An observational study using national surveillance data. *Lancet* **397**, 1819–1829 (2021). [doi:10.1016/S0140-6736\(21\)00947-8](https://doi.org/10.1016/S0140-6736(21)00947-8) [Medline](#)
11. J. Salo, M. Hägg, M. Kortelainen, T. Leino, T. Saxell, M. Siikanen, L. Sääksvuori, The indirect effect of mRNA-based Covid-19 vaccination on unvaccinated household members. medRxiv 2021.05.27.21257896 [Preprint] (2021). <https://doi.org/10.1101/2021.05.27.21257896>.
  12. M. Layan, M. Gilboa, T. Gonen, M. Goldenfeld, L. Meltzer, A. Andronico, N. Hozé, S. Cauchemez, G. Regev-Yochay, Impact of BNT162b2 vaccination and isolation on SARS-CoV-2 transmission in Israeli households: An observational study. medRxiv 2021.07.12.21260377 [Preprint] (2021). <https://doi.org/10.1101/2021.07.12.21260377>.
  13. O. Milman, I. Yelin, N. Aharony, R. Katz, E. Herzal, A. Ben-Tov, J. Kuint, S. Gazit, G. Chodick, T. Patalon, R. Kishony, Community-level evidence for SARS-CoV-2 vaccine protection of unvaccinated individuals. *Nat. Med.* **27**, 1367–1369 (2021). [doi:10.1038/s41591-021-01407-5](https://doi.org/10.1038/s41591-021-01407-5) [Medline](#)
  14. Israel Ministry of Health, “Israel COVID-19 Data Tracker” (2022); <https://datadashboard.health.gov.il/COVID-19/general>.
  15. European Centre for Disease Prevention and Control, “COVID-19 Vaccine Tracker” (2022); <https://vaccinetracker.ecdc.europa.eu/public/extensions/Covid-19/vaccine-tracker.html>.
  16. Mayo Clinic, “U.S. COVID-19 Vaccine Tracker” (2022); [www.mayoclinic.org/coronavirus-covid-19/vaccine-tracker](http://www.mayoclinic.org/coronavirus-covid-19/vaccine-tracker).
  17. T. J. Vanderweele, E. J. Tchetgen Tchetgen, M. E. Halloran, Components of the indirect effect in vaccine trials: Identification of contagion and infectiousness effects. *Epidemiology* **23**, 751–761 (2012). [doi:10.1097/EDE.0b013e31825fb7a0](https://doi.org/10.1097/EDE.0b013e31825fb7a0) [Medline](#)
  18. A. Richterman, E. A. Meyerowitz, M. Cevik, Indirect Protection by Reducing Transmission: Ending the Pandemic with Severe Acute Respiratory Syndrome Coronavirus 2 Vaccination. *Open Forum Infect. Dis.* **9**, ofab259 (2022). [doi:10.1093/ofid/ofab259](https://doi.org/10.1093/ofid/ofab259)
  19. N. Barda, N. Dagan, C. Cohen, M. A. Hernán, M. Lipsitch, I. S. Kohane, B. Y. Reis, R. D. Balicer, Effectiveness of a third dose of the BNT162b2 mRNA COVID-19 vaccine for preventing severe outcomes in Israel: An observational study. *Lancet* **398**, 2093–2100 (2021). [doi:10.1016/S0140-6736\(21\)02249-2](https://doi.org/10.1016/S0140-6736(21)02249-2) [Medline](#)
  20. M. Lipsitch, E. Tchetgen Tchetgen, T. Cohen, Negative controls: A tool for detecting confounding and bias in observational studies. *Epidemiology* **21**, 383–388 (2010). [doi:10.1097/EDE.0b013e3181d61eeb](https://doi.org/10.1097/EDE.0b013e3181d61eeb) [Medline](#)
  21. X. Shi, W. Miao, E. T. Tchetgen, A Selective Review of Negative Control Methods in Epidemiology. *Curr. Epidemiol. Rep.* **7**, 190–202 (2020). [doi:10.1007/s40471-020-00243-4](https://doi.org/10.1007/s40471-020-00243-4) [Medline](#)
  22. L. S. Shekerdemian, N. R. Mahmood, K. K. Wolfe, B. J. Riggs, C. E. Ross, C. A. McKiernan, S. M. Heidemann, L. C. Kleinman, A. I. Sen, M. W. Hall, M. A. Priestley, J. K. McGuire, K. Boukas, M. P. Sharron, J. P. Burns, International COVID-19 PICU Collaborative, Characteristics and Outcomes of Children With Coronavirus Disease 2019

- (COVID-19) Infection Admitted to US and Canadian Pediatric Intensive Care Units. *JAMA Pediatr.* **174**, 868–873 (2020). [doi:10.1001/jamapediatrics.2020.1948](https://doi.org/10.1001/jamapediatrics.2020.1948) [Medline](#)
23. J. Toubiana, C. Poirault, A. Corsia, F. Bajolle, J. Fourgeaud, F. Angoulvant, A. Debray, R. Basmaci, E. Salvador, S. Biscardi, P. Frange, M. Chalumeau, J.-L. Casanova, J. F. Cohen, S. Allali, Kawasaki-like multisystem inflammatory syndrome in children during the covid-19 pandemic in Paris, France: Prospective observational study. *BMJ* **369**, m2094 (2020). [doi:10.1136/bmj.m2094](https://doi.org/10.1136/bmj.m2094) [Medline](#)
24. J. F. Ludvigsson, Case report and systematic review suggest that children may experience similar long-term effects to adults after clinical COVID-19. *Acta Paediatr.* **110**, 914–921 (2021). [doi:10.1111/apa.15673](https://doi.org/10.1111/apa.15673) [Medline](#)
25. A. Mastrangelo, W. Morello, E. Vidal, I. Guzzo, L. Annicchiarico Petruzzelli, E. Benetti, M. Materassi, M. Giordano, A. Pasini, C. Corrado, G. Puccio, R. Chimenz, C. Pecoraro, L. Massella, L. Peruzzi, G. Montini, COVID-19 Task Force of the Italian Society of Pediatric Nephrology, Impact of COVID-19 Pandemic in Children with CKD or Immunosuppression. *Clin. J. Am. Soc. Nephrol.* **16**, 449–451 (2021). [doi:10.2215/CJN.13120820](https://doi.org/10.2215/CJN.13120820) [Medline](#)
26. E. Goldstein, K. Paur, C. Fraser, E. Kenah, J. Wallinga, M. Lipsitch, Reproductive numbers, epidemic spread and control in a community of households. *Math. Biosci.* **221**, 11–25 (2009). [doi:10.1016/j.mbs.2009.06.002](https://doi.org/10.1016/j.mbs.2009.06.002) [Medline](#)
27. E. K. Accorsi, X. Qiu, E. Rumpler, L. Kennedy-Shaffer, R. Kahn, K. Joshi, E. Goldstein, M. J. Stensrud, R. Niehus, M. Cevik, M. Lipsitch, How to detect and reduce potential sources of biases in studies of SARS-CoV-2 and COVID-19. *Eur. J. Epidemiol.* **36**, 179–196 (2021). [doi:10.1007/s10654-021-00727-7](https://doi.org/10.1007/s10654-021-00727-7) [Medline](#)
28. S. Hayek, G. Shaham, Y. Ben-Shlomo, E. Kepten, N. Dagan, D. Nevo, M. Lipsitch, B. Reis, R. Balicer, N. Barda, Indirect protection of children from SARS-CoV-2 infection through parental vaccination, Zenodo (2022); <https://doi.org/10.5281/zenodo.5883892>.
29. M. A. Hernán, J. M. Robins, Using Big Data to Emulate a Target Trial When a Randomized Trial Is Not Available. *Am. J. Epidemiol.* **183**, 758–764 (2016). [doi:10.1093/aje/kwv254](https://doi.org/10.1093/aje/kwv254) [Medline](#)
30. M. E. Halloran, C. J. Struchiner, Study designs for dependent happenings. *Epidemiology* **2**, 331–338 (1991). [doi:10.1097/00001648-199109000-00004](https://doi.org/10.1097/00001648-199109000-00004) [Medline](#)
31. M. E. Halloran, The Minicommunity Design to Assess Indirect Effects of Vaccination. *Epidemiol. Methods* **1**, 83–105 (2012). [doi:10.1515/2161-962X.1008](https://doi.org/10.1515/2161-962X.1008) [Medline](#)
32. L. N. Yelland, A. B. Salter, P. Ryan, Performance of the modified Poisson regression approach for estimating relative risks from clustered prospective data. *Am. J. Epidemiol.* **174**, 984–992 (2011). [doi:10.1093/aje/kwr183](https://doi.org/10.1093/aje/kwr183) [Medline](#)
33. G. Y. Zou, A. Donner, Extension of the modified Poisson regression model to prospective studies with correlated binary data. *Stat. Methods Med. Res.* **22**, 661–670 (2013). [doi:10.1177/0962280211427759](https://doi.org/10.1177/0962280211427759) [Medline](#)
34. G. Zou, A modified poisson regression approach to prospective studies with binary data. *Am. J. Epidemiol.* **159**, 702–706 (2004). [doi:10.1093/aje/kwh090](https://doi.org/10.1093/aje/kwh090) [Medline](#)

35. D. L. Miglioretti, P. J. Heagerty, Marginal modeling of nonnested multilevel data using standard software. *Am. J. Epidemiol.* **165**, 453–463 (2007). [doi:10.1093/aje/kwk020](https://doi.org/10.1093/aje/kwk020) [Medline](#)
36. S. Seaman, M. Pavlou, A. Copas, Review of methods for handling confounding by cluster and informative cluster size in clustered data. *Stat. Med.* **33**, 5371–5387 (2014). [doi:10.1002/sim.6277](https://doi.org/10.1002/sim.6277) [Medline](#)
